# Supplementary material for: The capability of very high-resolution satellite imagery for plot-level early wheat stem rust disease detection, monitoring, and phenotyping in Ethiopia
Source: Research Square preprint supplement (doi:10.21203/rs.3.rs-7652033/v1), 2026-02-12
Supplement: Supplementary file 1 [file 03e8e73db6cab06a3b7bcce2.docx]

**Supplementary Information**

S1. Overview of calculated VIs.

| Index | Formula | | Traits | Relevant Studies |
| --- | --- | --- | --- | --- |
| Chlorophyll Index - Green (CIG) |  | | chlorophyll | [97] |
| Chlorophyll Vegetation Index (CVI) |  | | chlorophyll | [97] |
| Green Leaf Index (GLI) |  | | chlorophyll | [98] |
| Modified Soil Adjusted Vegetation Index 2 (MSAVI2) | ] | | disease (YR) | [47] |
| Modified Simple Ratio (MSR) |  | | disease | [48] |
| Optimized Soil-Adjusted Vegetation Index (OSAVI) |  | | disease | [48] |
| Plant Senescence Reflectance Index (PSRI) (only Pleiades-Neo) |  | | chlorophyll, nitrogen, maturity | [99] |
| Re-normalized Difference Vegetation Index (RDVI) |  | | disease (YR) | [37] |
| Soil Adjusted Vegetation Index (SAVI) |  | L=0.5 | disease (YR) | [31,37,47] |
| Triangular Vegetation Index (TVI) |  | | disease (YR), green LAI, chlorophyll, canopy | [31,34,47] |

Note: *R*: measured reflectance at the original wavelength or wavebands specified by the subscript (G: Green; R: Red; NIR: near-infrared).

S2a. Trial 1 – YR visual disease scoring results per plot, showing incidence in percentage, severity in percentage, and host plant reaction (on DAI 0, YR was not observed in the plots).

| **Plot** | **Variety** | **Block1** | **DAI 17** | **DAI 30** | **DAI 37** |
| --- | --- | --- | --- | --- | --- |
| 1 | Kubsa | UT | 15/5/S | 100/60/S | 100/70/MS-S |
| 2 | Hidase | 0/0/- | 35/20/S | 0/0/- |
| 3 | Danda’a | 0/0/- | 10/5/MR-MS | 0/0/- |
| 4 | Kingbird | 0/0/- | 20/5/MS | 0/0/- |
| 5 | Pavon-76 | 0/0/- | 25/5/MS | 0/0/- |
| 6 | Shorima | 5/2/MS | 10/5/MS | 0/0/- |
| 7 | Danda’a | T | 0/0/- | 0/0/- | 0/0/- |
| 8 | Kubsa | 20/5/S | 50/25/MR-MS | 0/0/- |
| 9 | Hidase | 10/5/MS | 10/5/MR-MS | 0/0/- |
| 10 | Shorima | 0/0/- | 0/0/- | 0/0/- |
| 11 | Pavon-76 | 0/0/- | 0/0/- | 0/0/- |
| 12 | Kingbird | 0/0/- | 0/0/- | 0/0/- |
| 13 | Shorima | 0/0/- | 0/0/- | 0/0/- |
| 14 | Danda’a | 0/0/- | 0/0/- | 0/0/- |
| 15 | Kingbird | 0/0/- | 0/0/- | 0/0/- |
| 16 | Pavon-76 | 6/1/MS | 0/0/- | 0/0/- |
| 17 | Kubsa | 0/0/- | 0/0/- | 0/0/- |
| 18 | Hidase | 10/5/MS | 0/0/- | 0/0/- |
| 19 | Hidase | UT | 5/1/MS | 30/15/MS-S | 0/0/- |
| 20 | Danda’a | 0/0/- | 10/5/MS | 0/0/- |
| 21 | Kubsa | 30/15/S | 70/25/MS-S | Not scored |
| 22 | Shorima | 0/0/- | 20/5/MS | 0/0/- |
| 23 | Pavon-76 | 0/0/- | 10/5/MS | 0/0/- |
| 24 | Kingbird | 0/0/- | 10/5/MS-S | 0/0/- |
| 25 | Danda’a | 0/0/- | 20/5/MS-S | 0/0/- |
| 26 | Kubsa | 40/15/S | 100/40/MS-S | 100/50/S |
| 27 | Pavon-76 | 0/0/- | 20/5/MS | 0/0/- |
| 28 | Kingbird | 0/0/- | 0/0/- | 0/0/- |
| 29 | Hidase | 5/2/MS | 30/15/S | 0/0/- |
| 30 | Shorima | 0/0/- | 10/5/MS | 0/0/- |
| 31 | Danda’a | T | 5/2/MS | 0/0/- | 0/0/- |
| 32 | Kubsa | 25/10/S | 20/10/MR | 0/0/- |
| 33 | Shorima | 0/0/- | 0/0/- | 0/0/- |
| 34 | Hidase | 15/10/S | 0/0/- | 0/0/- |
| 35 | Kingbird | 0/0/- | 0/0/- | 0/0/- |
| 36 | Pavon-76 | 0/0/- | 0/0/- | 0/0/- |

1 T: treated, fungicide treatment block; UT: untreated, non-fungicide treatment block;

2 S: susceptible; MS-S: moderately susceptible to susceptible; MS: moderately susceptible; MR-MS: moderately resistant to moderately susceptible; MR: moderately resistant [67].

S2b. Trial 2 – YR visual disease scoring results per plot, showing incidence in percentage, severity in percentage, and host plant reaction (on DAI 0, YR was not observed in the plots).

| **Plot** | **Variety** | **Block1** | **DAI 17** | **DAI 30** | **DAI 37** |
| --- | --- | --- | --- | --- | --- |
| 37 | Kubsa | UT | 25/10/S | 90/40/S | 100/60/S |
| 38 | Hidase | 0/0/- | 20/10/S | 0/0/- |
| 39 | Danda’a | 0/0/- | 0/0/- | 0/0/- |
| 40 | Kingbird | 0/0/- | 0/0/- | 0/0/- |
| 41 | Pavon-76 | 0/0/- | 0/0/- | 50/30/S |
| 42 | Shorima | 6/2/MS | 10/5/S | 0/0/- |
| 43 | Danda’a | T | 0/0/- | 0/0/- | 0/0/- |
| 44 | Kubsa | 0/0/- | 0/0/- | 0/0/- |
| 45 | Hidase | 20/5/MS | 0/0/- | 0/0/- |
| 46 | Shorima | 0/0/- | 0/0/- | 0/0/- |
| 47 | Pavon-76 | 0/0/- | 0/0/- | 0/0/- |
| 48 | Kingbird | 0/0/- | 0/0/- | 0/0/- |
| 49 | Shorima | 0/0/- | 0/0/- | 0/0/- |
| 50 | Danda’a | 0/0/- | 0/0/- | 0/0/- |
| 51 | Kingbird | 0/0/- | 0/0/- | 0/0/- |
| 52 | Pavon-76 | 20/5/MS | 0/0/- | 0/0/- |
| 53 | Kubsa | 0/0/- | 10/5/MR | 0/0/- |
| 54 | Hidase | 0/0/- | 0/0/- | 0/0/- |
| 55 | Hidase | UT | 0/0/- | 10/5/S | 0/0/- |
| 56 | Danda’a | 10/5/MS-S | 10/5/S | 0/0/- |
| 57 | Kubsa | 0/0/- | 90/50/S | 100/60/S |
| 58 | Shorima | 5/2/MS | 10/5/S | 0/0/- |
| 59 | Pavon-76 | 0/0/- | 15/5/MS | 0/0/- |
| 60 | Kingbird | 0/0/- | 20/15/MS | 0/0/- |
| 61 | Danda’a | 25/10/S | 10/5/S | 0/0/- |
| 62 | Kubsa | 15/5/MS | 100/50/S | 100/100/S |
| 63 | Pavon-76 | 0/0/- | 10/5/S | 40/20/S |
| 64 | Kingbird | 10/2/MS | 0/0/- | 0/0/- |
| 65 | Hidase | 0/0/- | 10/5/S | 40/20/S |
| 66 | Shorima | 0/0/- | 10/5/S | 0/0/- |
| 67 | Danda’a | T | 0/0/- | 0/0/- | 0/0/- |
| 68 | Kubsa | 20/5/MS-S | 0/0/- | 0/0/- |
| 69 | Shorima | 0/0/- | 0/0/- | 0/0/- |
| 70 | Hidase | 0/0/- | 0/0/- | 0/0/- |
| 71 | Kingbird | 0/0/- | 0/0/- | 0/0/- |
| 72 | Pavon-76 | 0/0/- | 0/0/- | 0/0/- |

1 T: treated, fungicide treatment block; UT: untreated, non-fungicide treatment block;

2 S: susceptible; MS-S: moderately susceptible to susceptible; MS: moderately susceptible; MR-MS: moderately resistant to moderately susceptible; MR: moderately resistant [67].

**a)**

**b)**

**c)**

**d)**


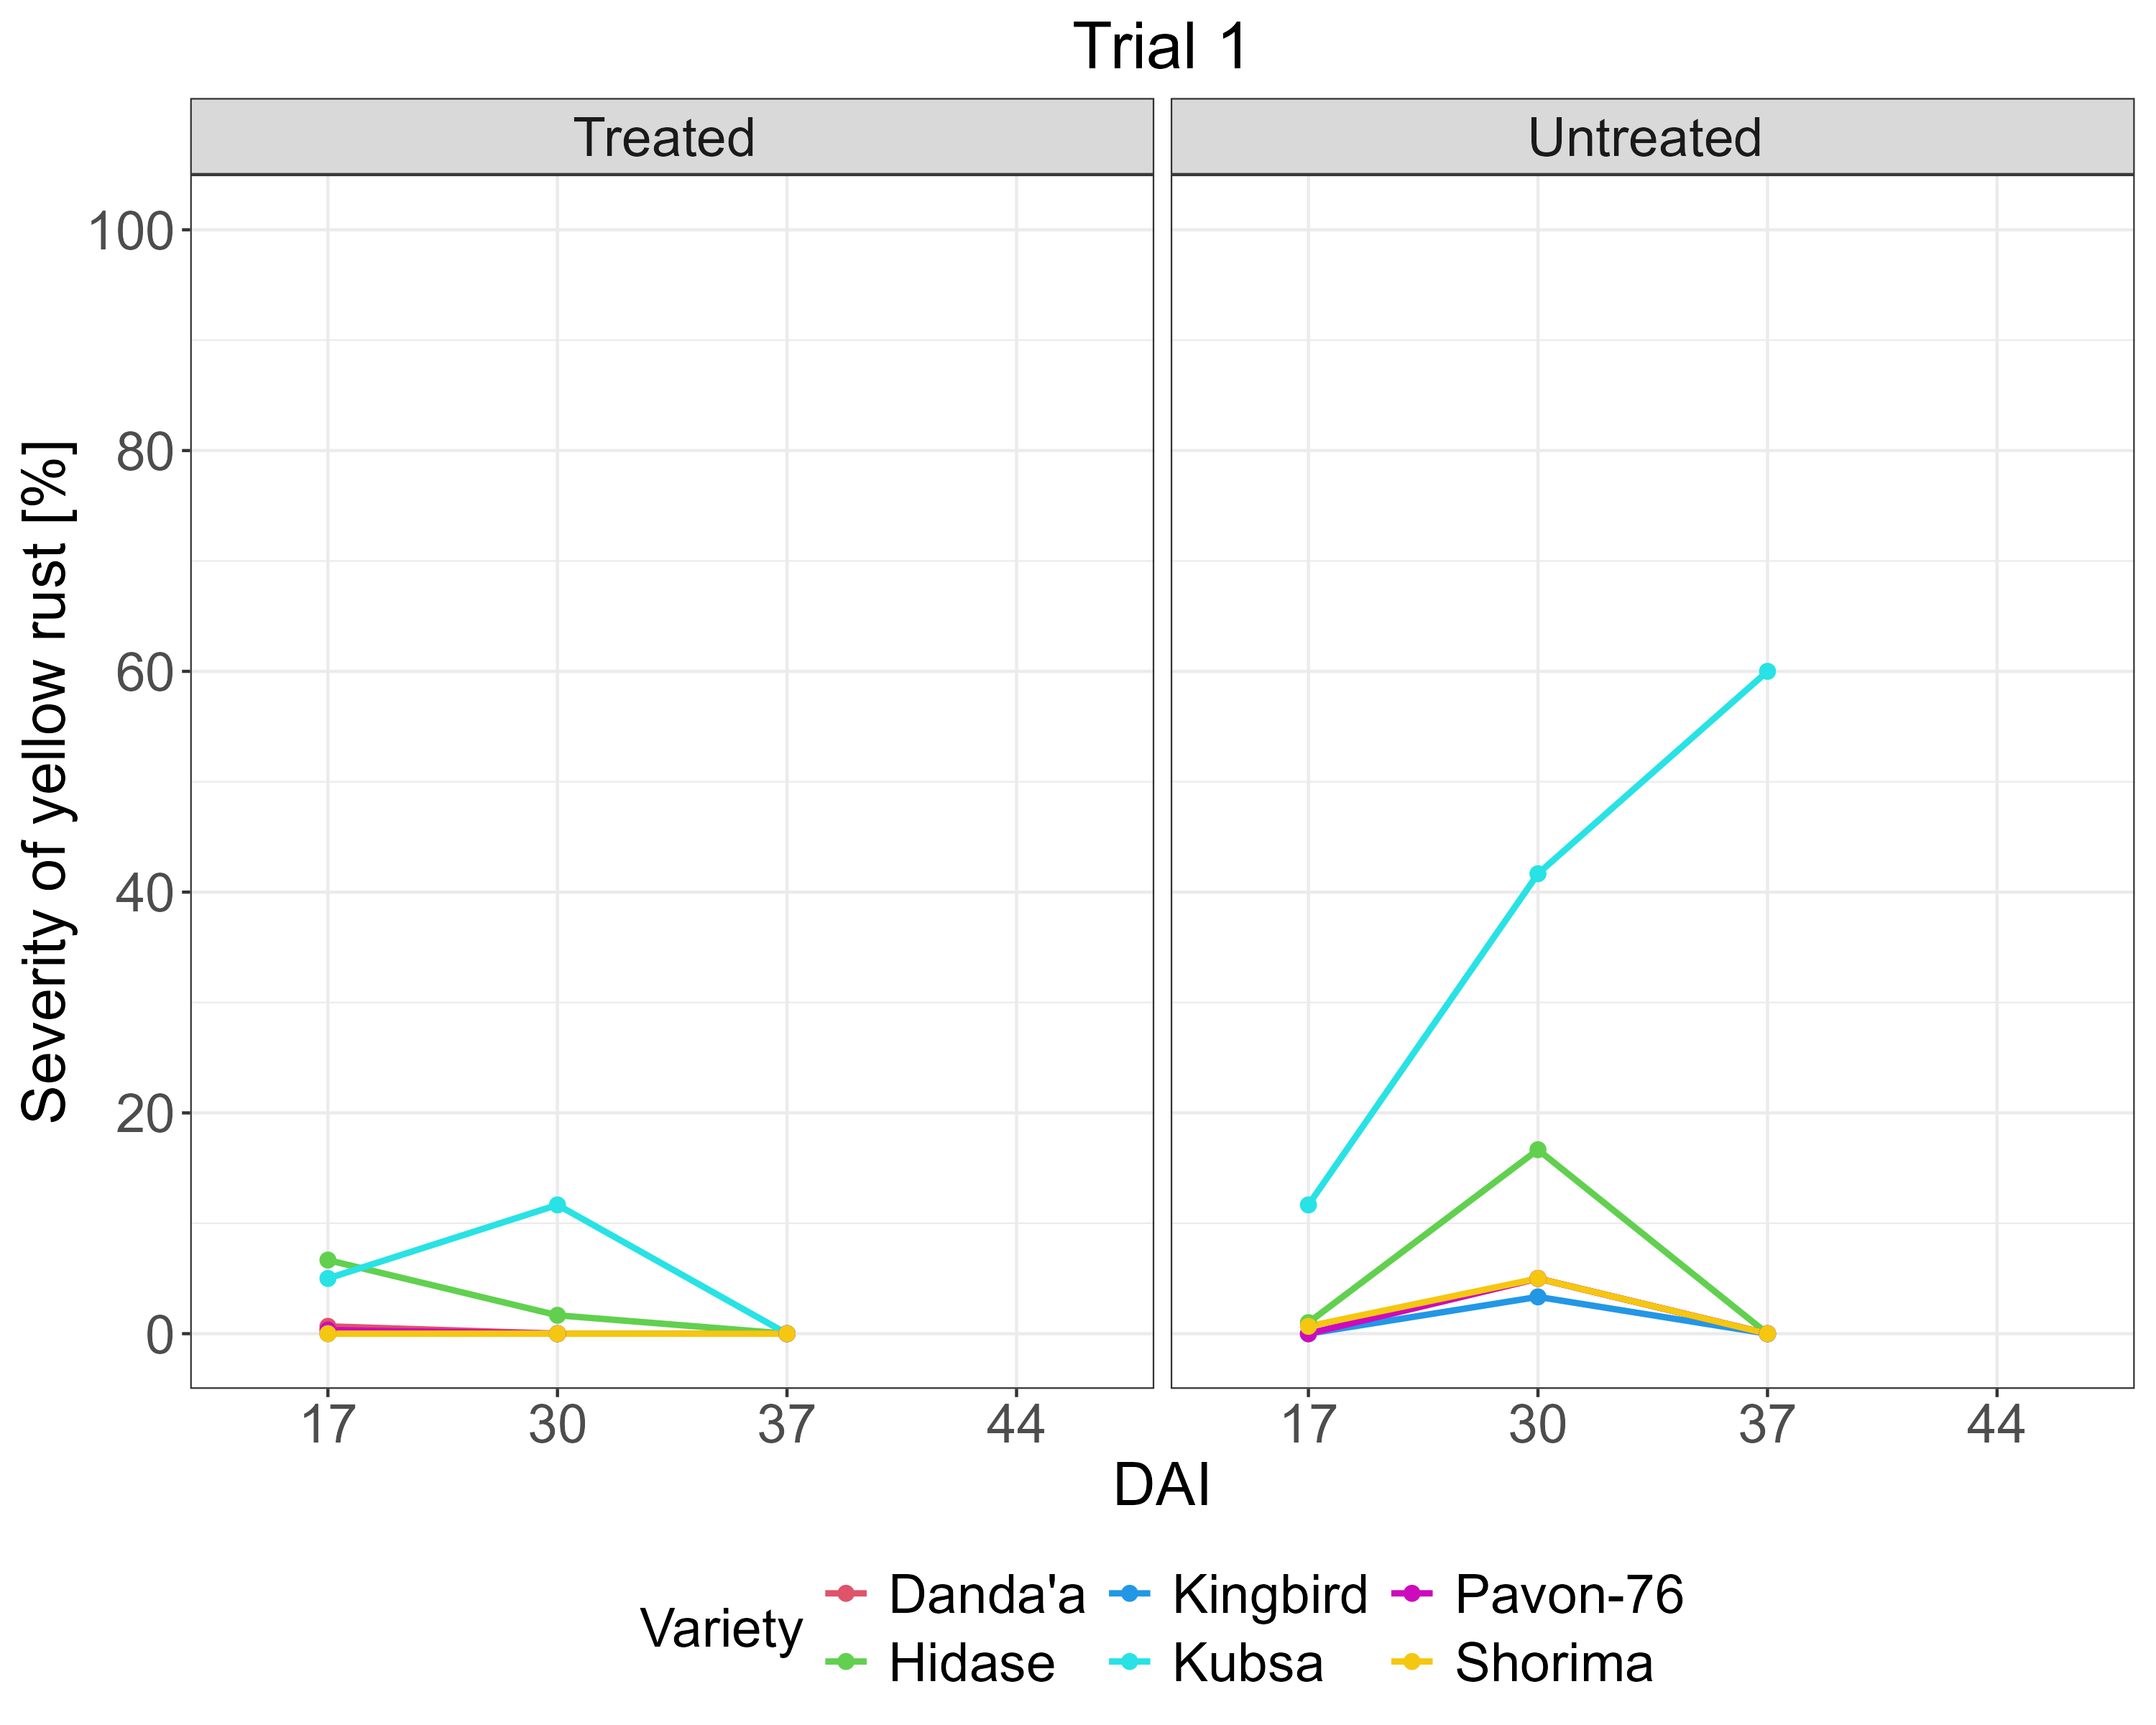

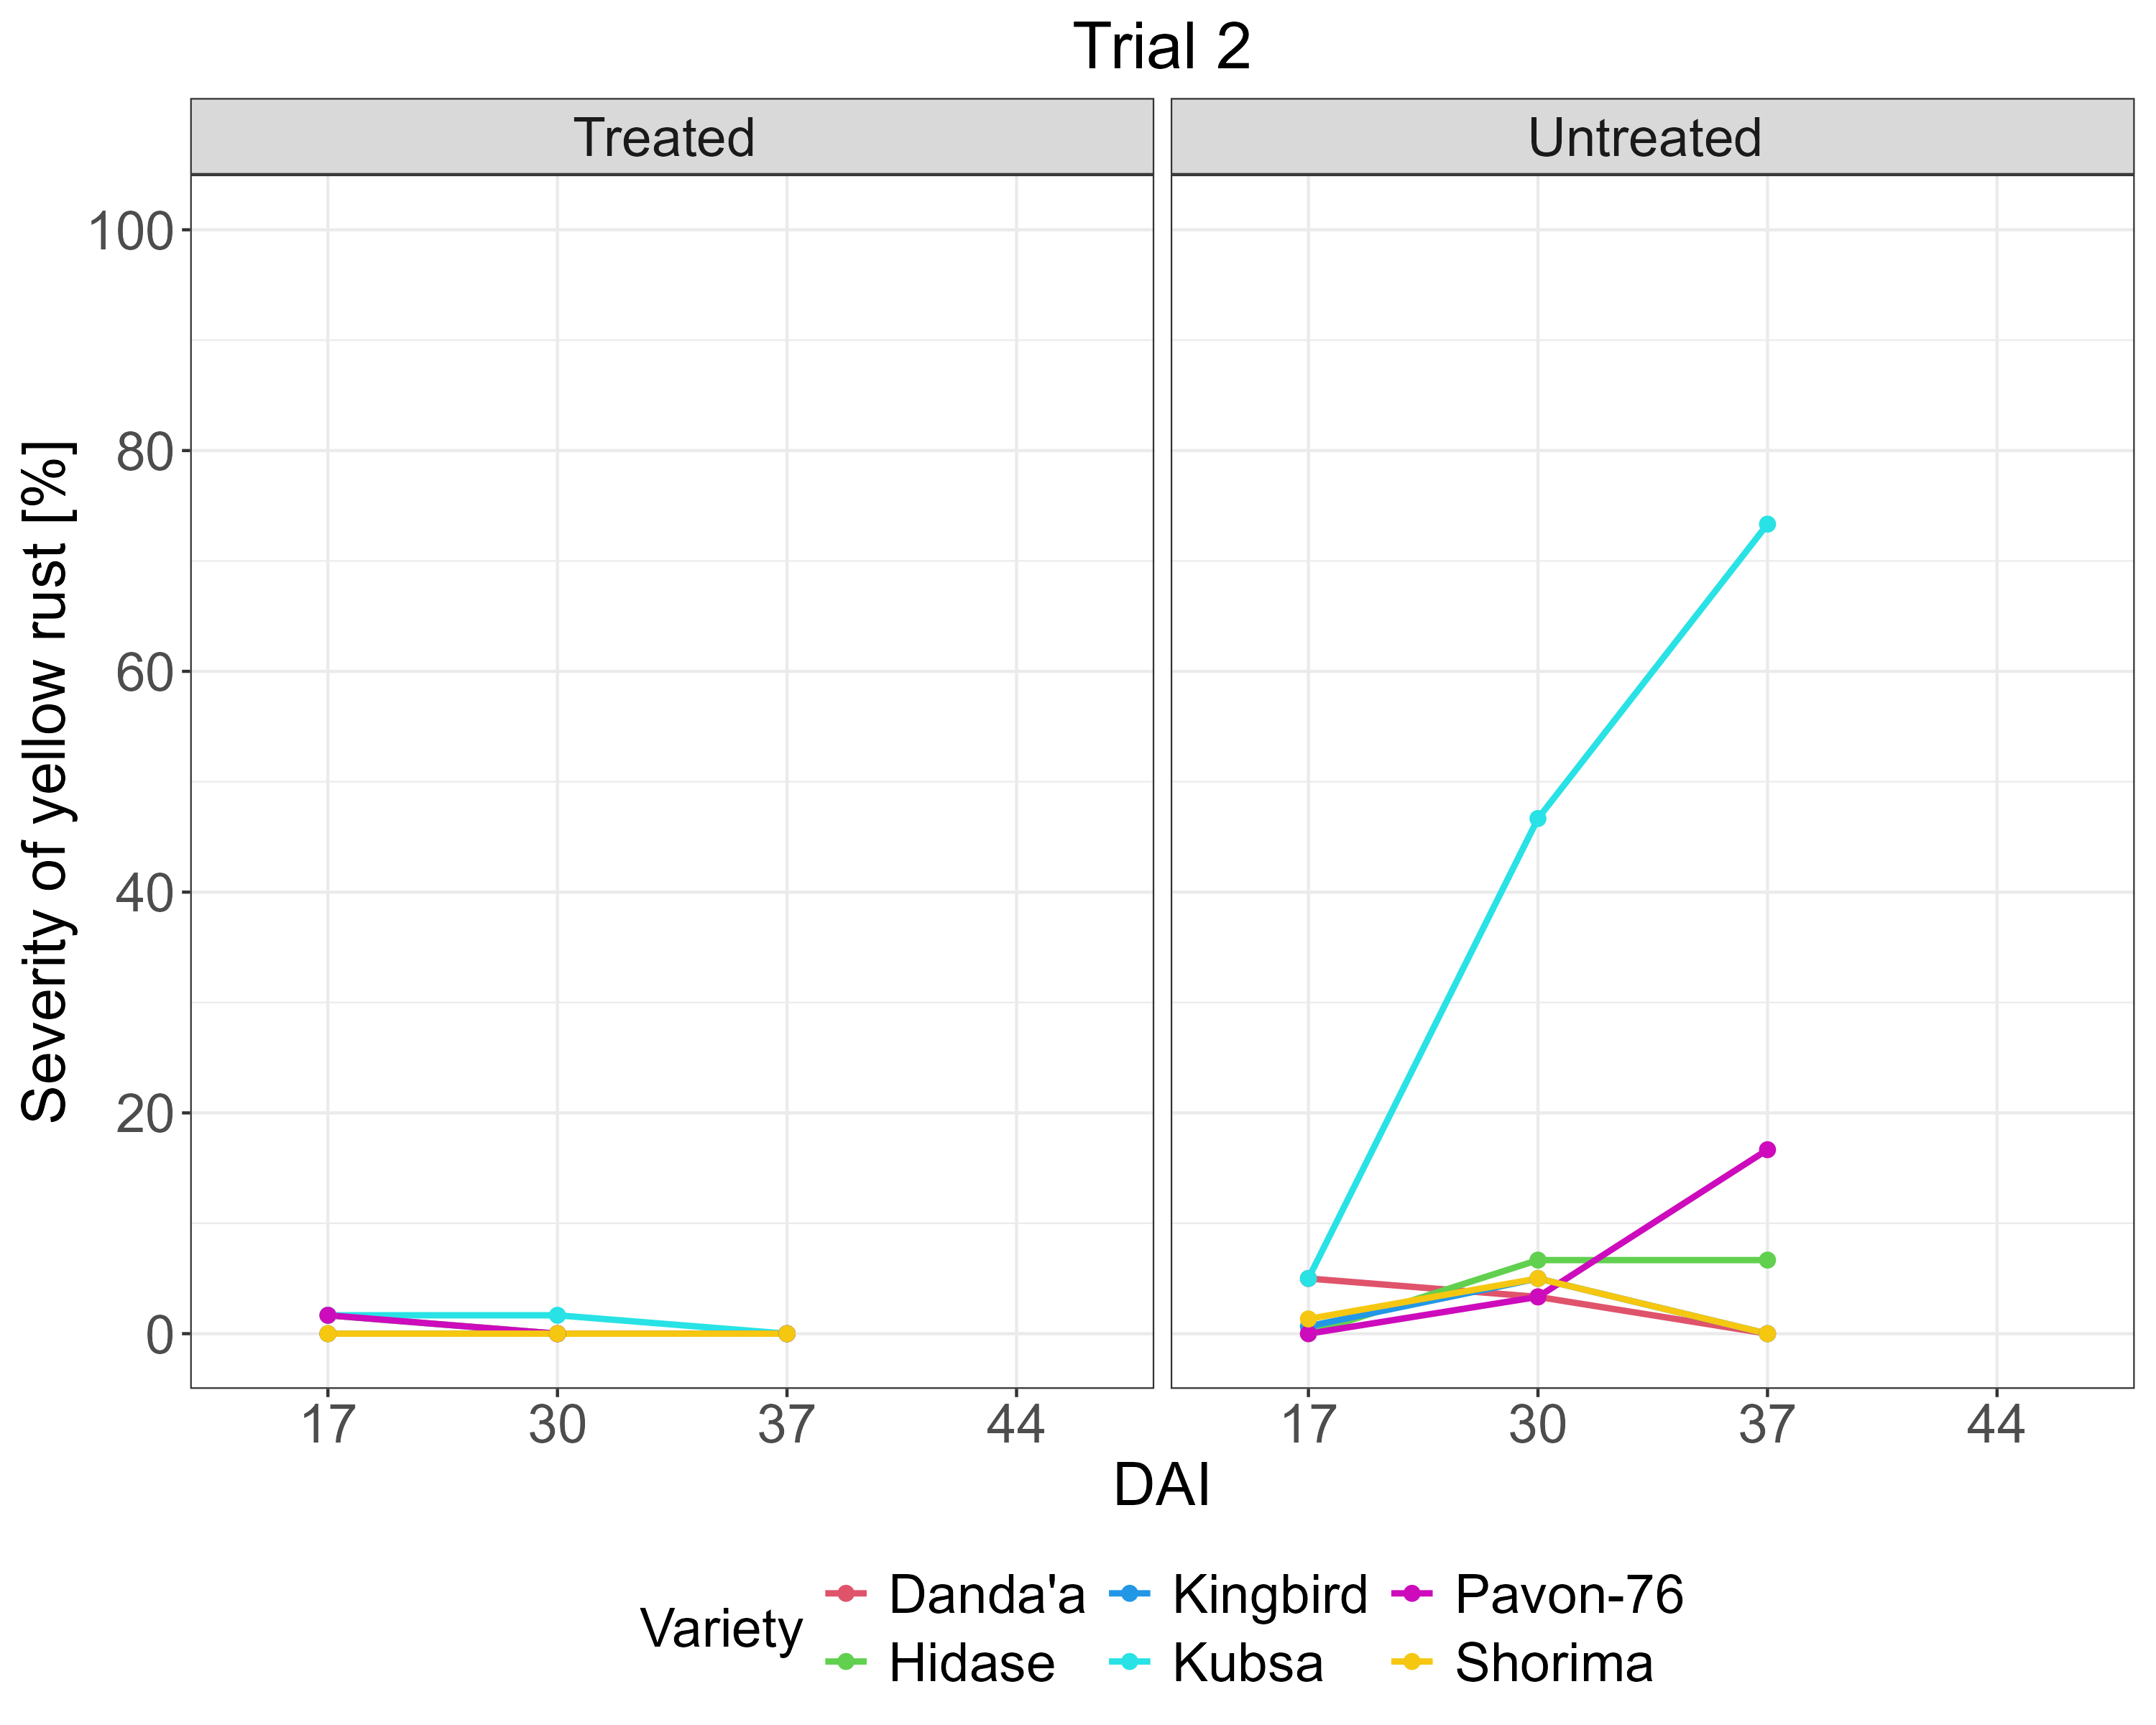

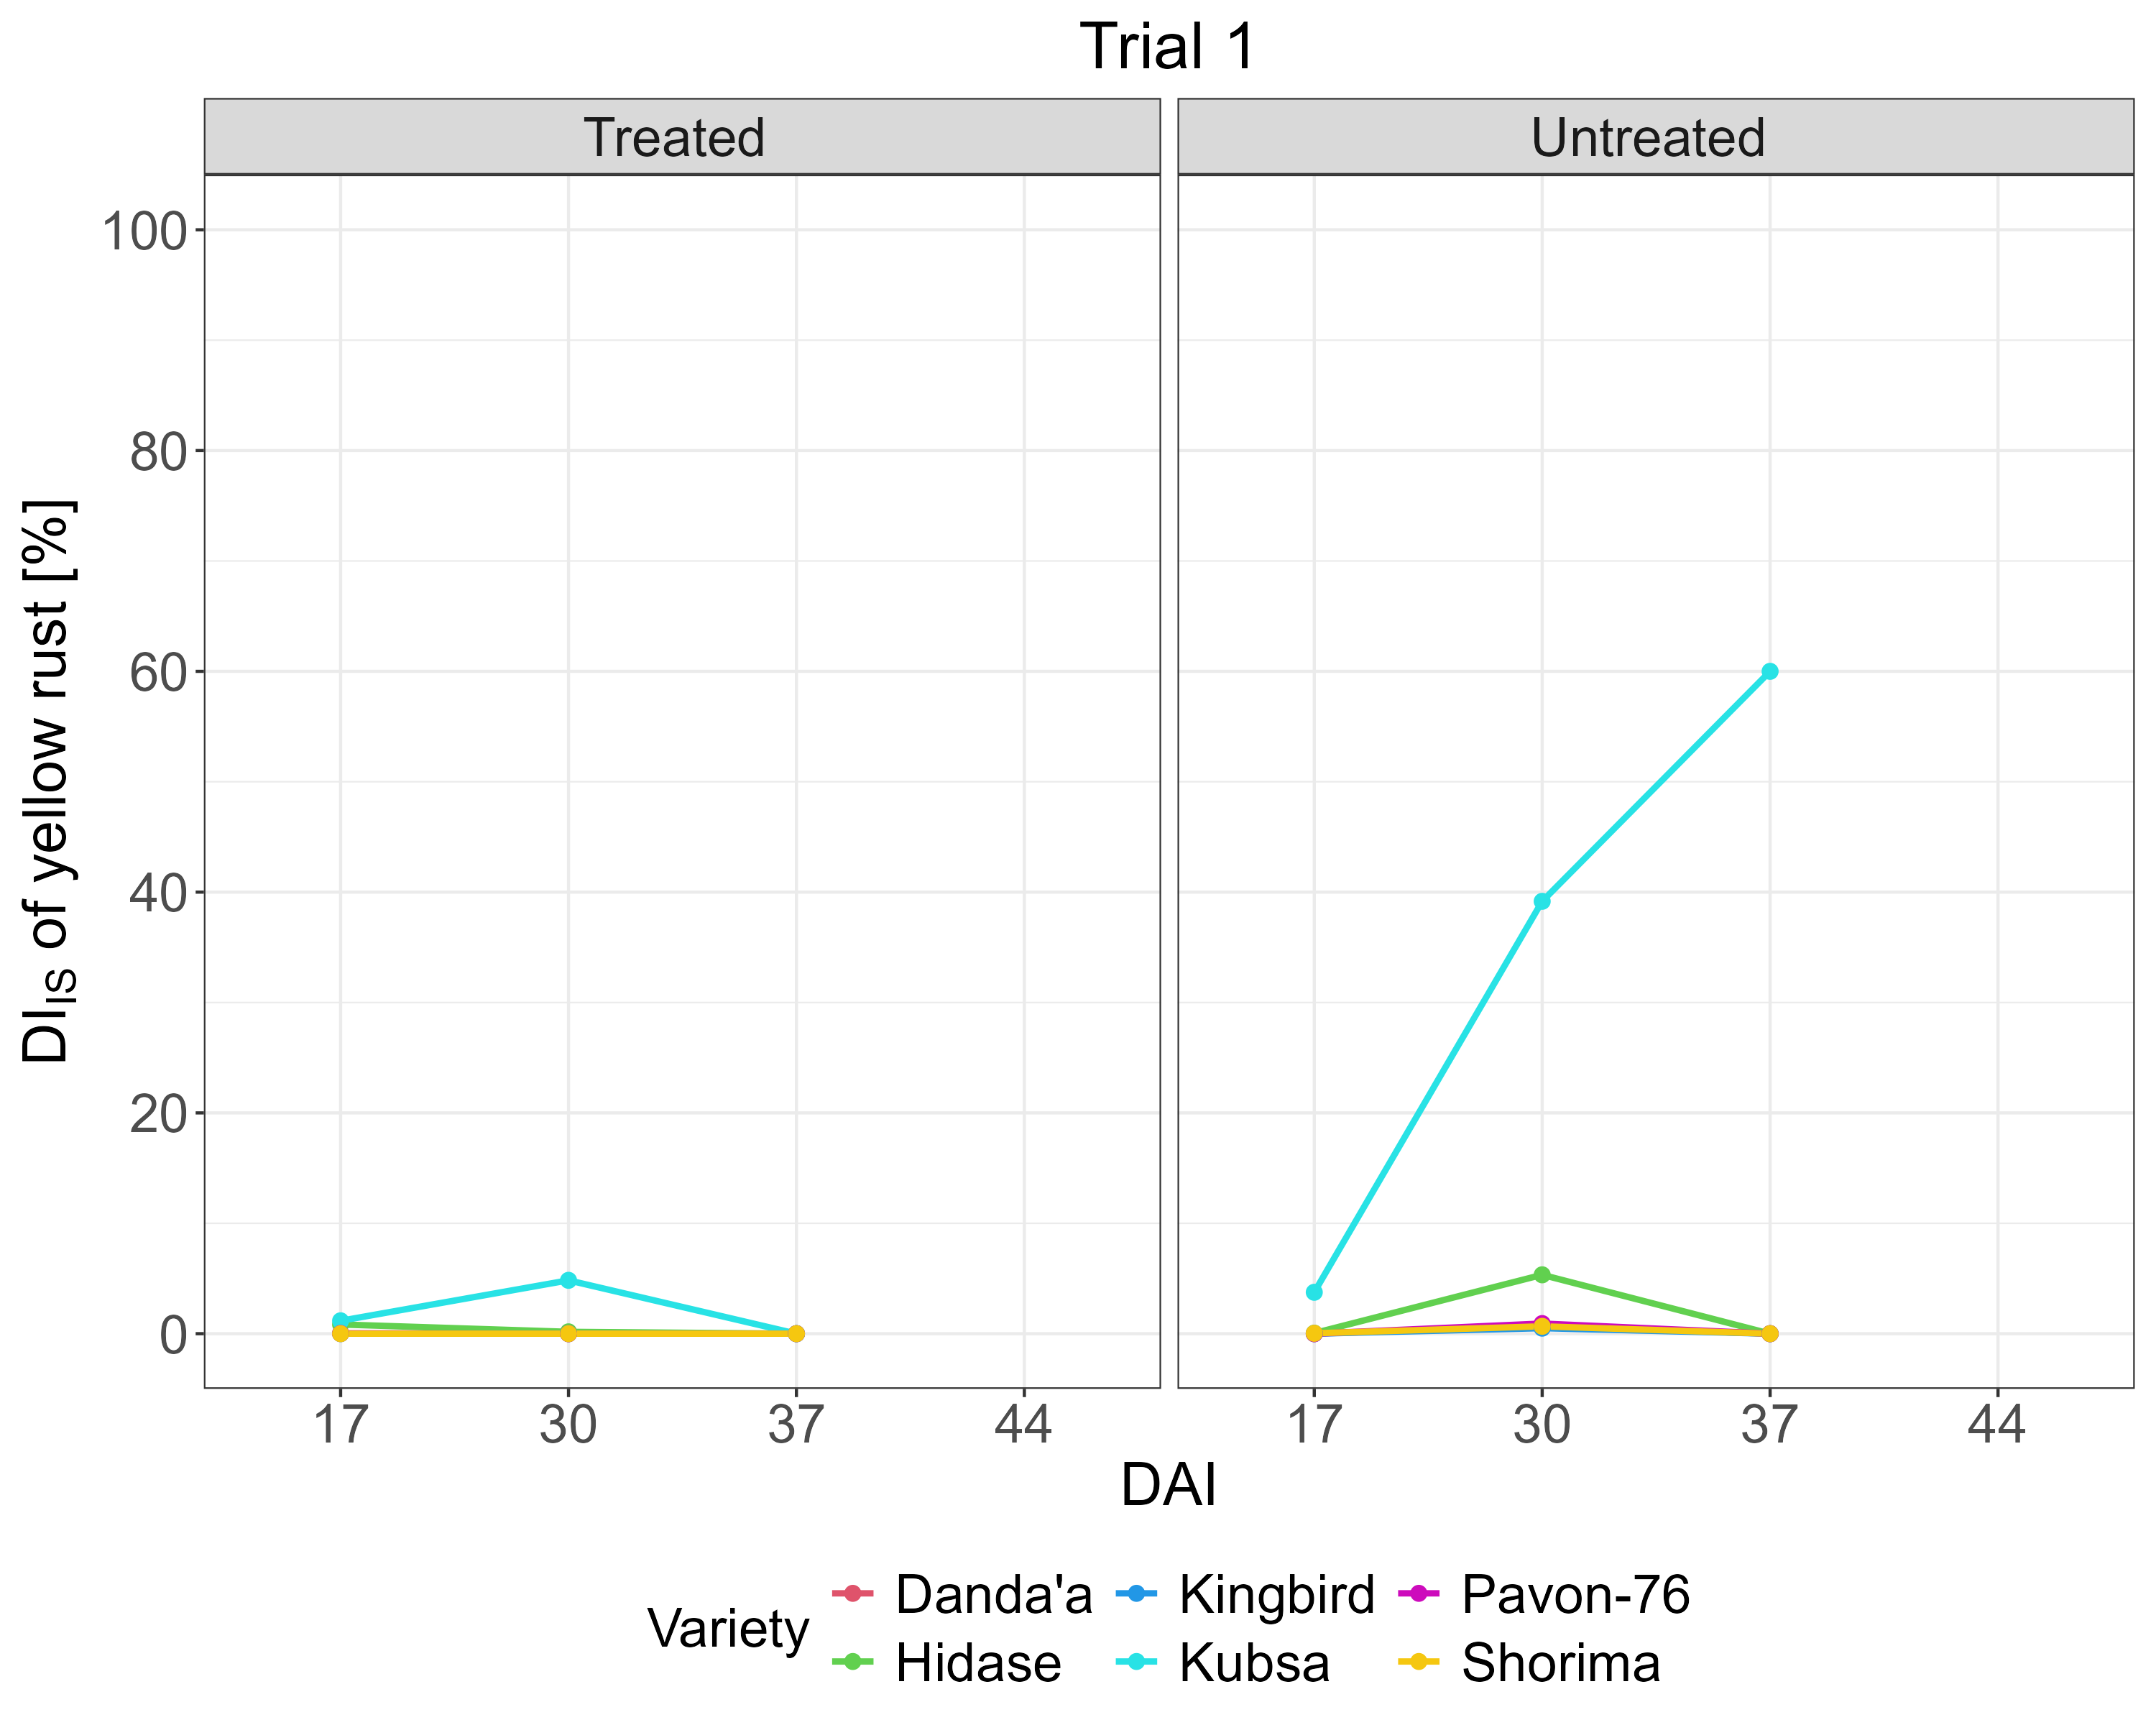

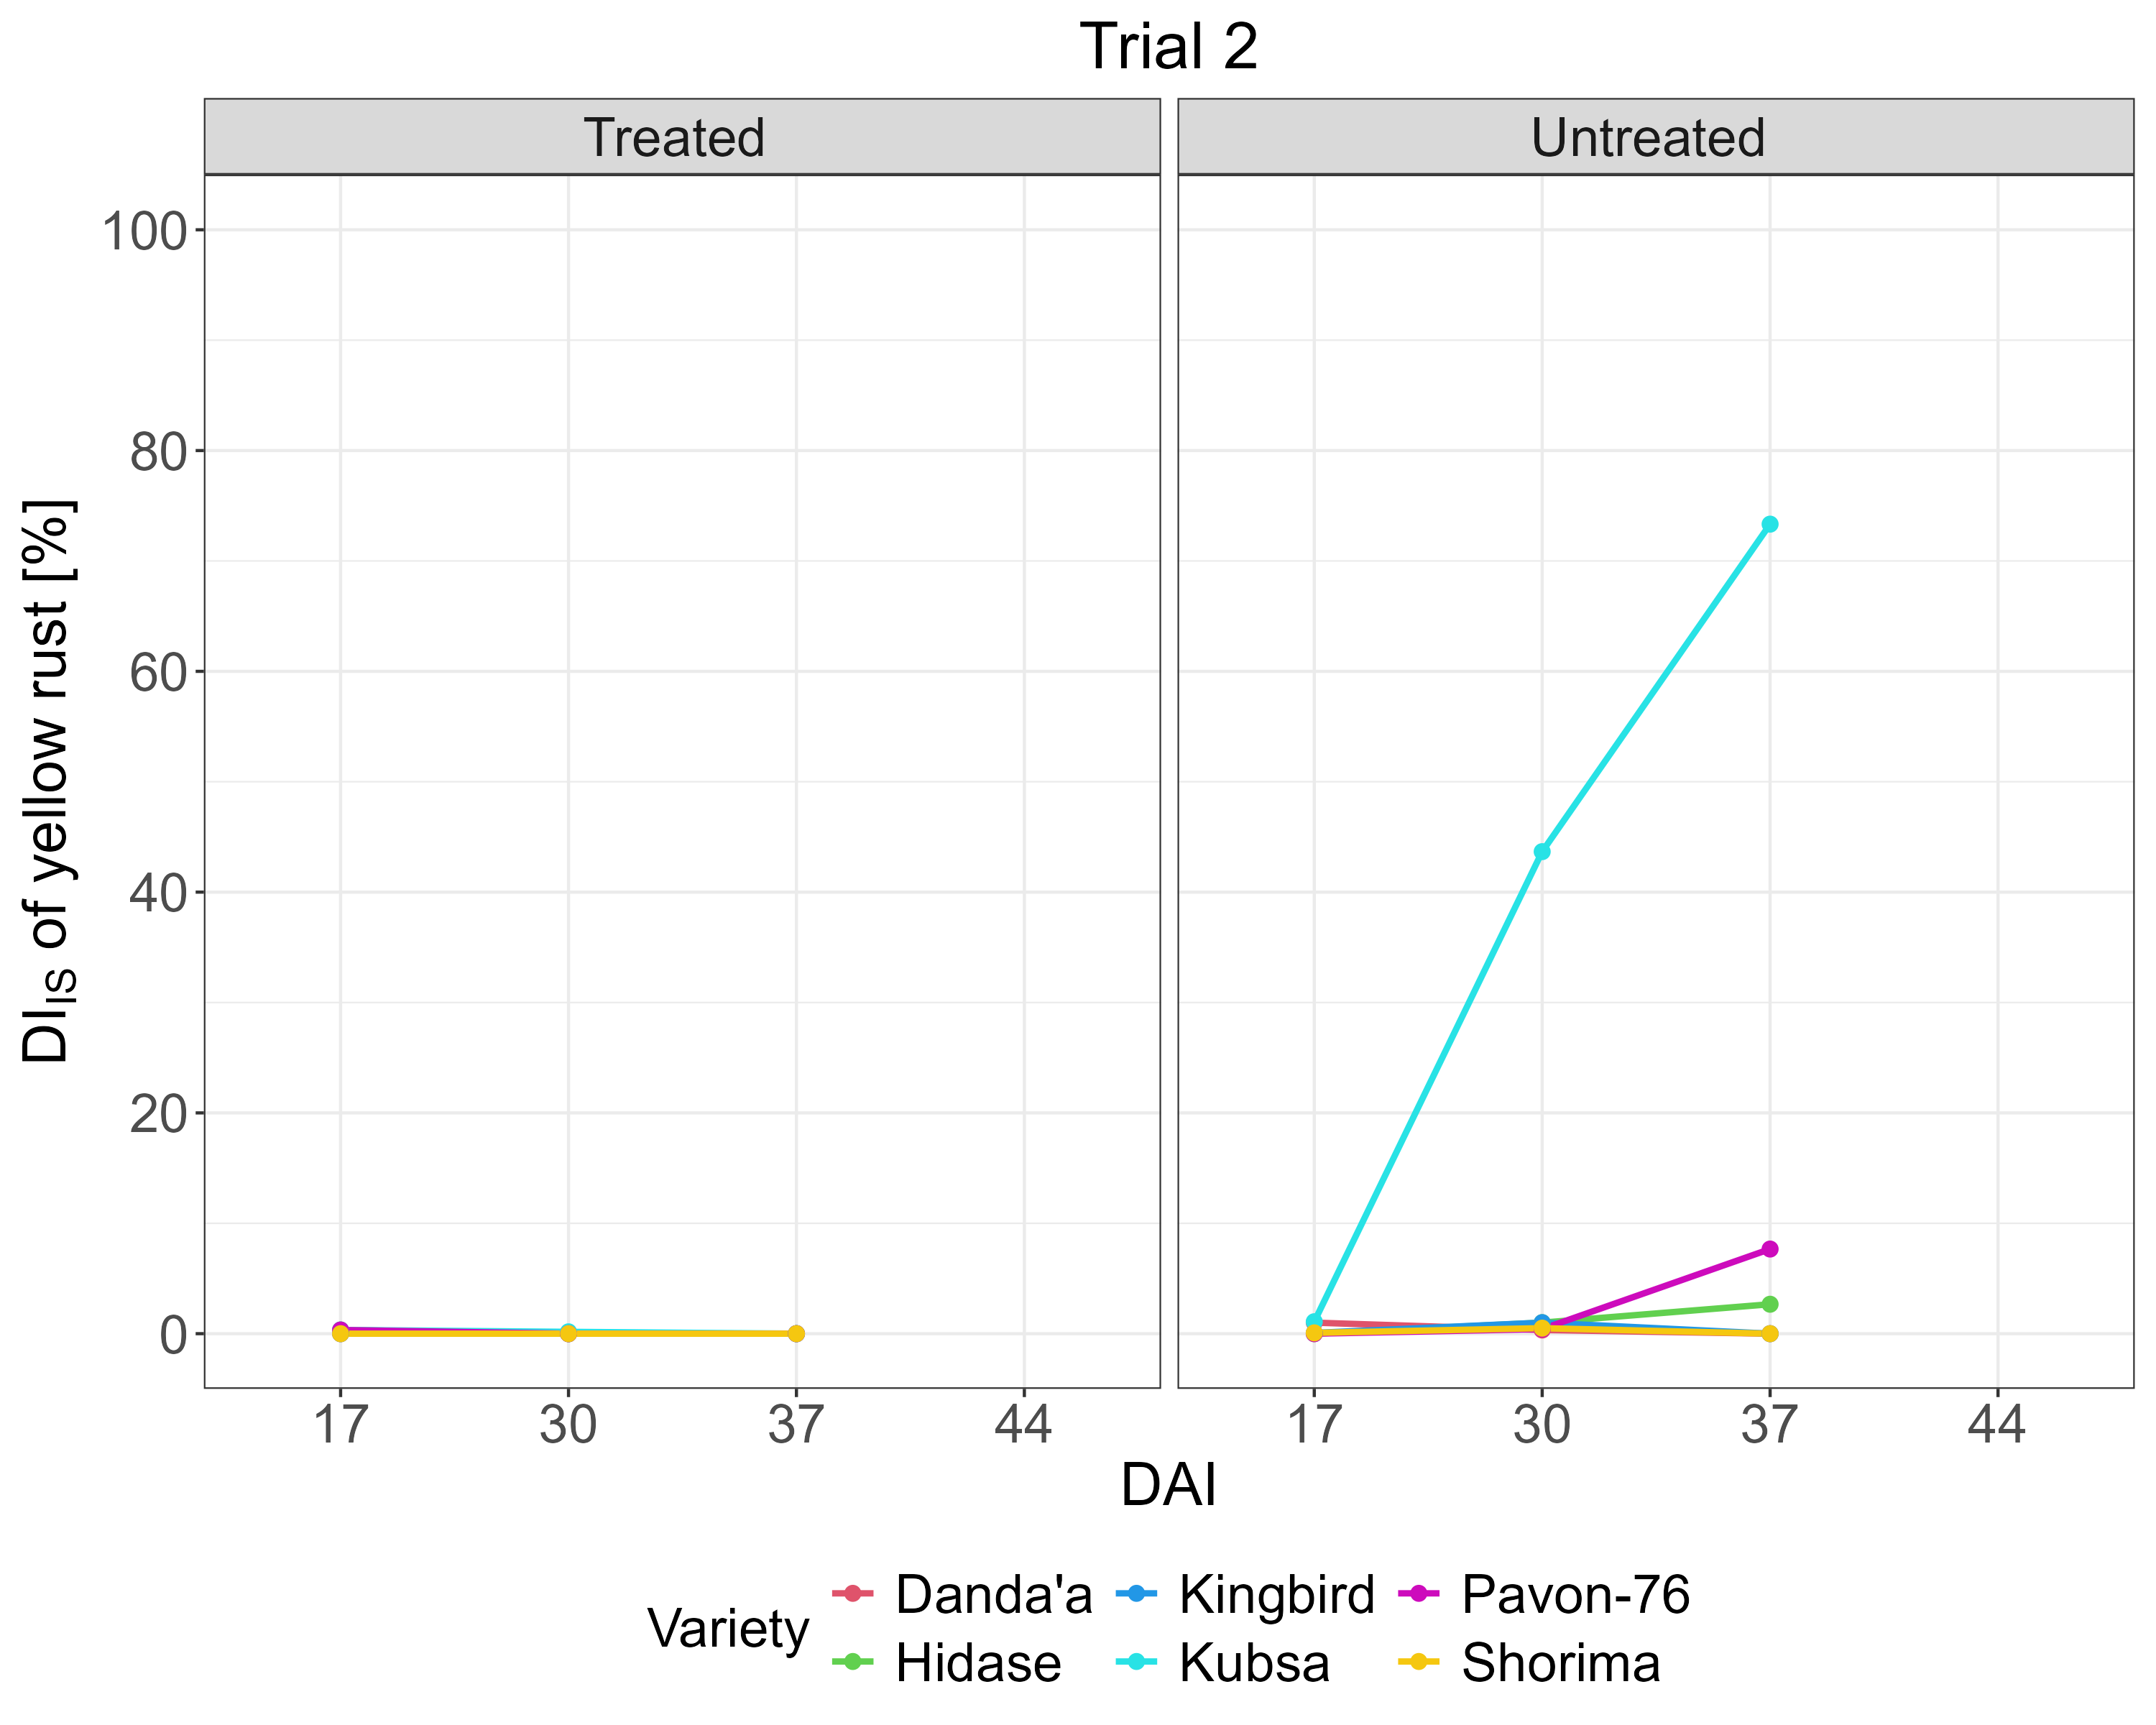


S3. YR disease progression per wheat variety and treatment block for Trials 1 and 2 – severity (**a**, **b**) and DIIS (**c**, **d**).

S4a. Trial 1 – SR visual disease scoring results per plot, showing incidence in percentage, severity in percentage, and host plant reaction (on DAI 0, SR was not observed in the plots).

| **Plot** | **Variety** | **Block1** | **DAI 17** | **DAI 30** | **DAI 37** | **DAI 44** |
| --- | --- | --- | --- | --- | --- | --- |
| 1 | Kubsa | UT | 5/2/MS | 70/40/MS-S | 100/70/MS-S | 100/80/MS-S |
| 2 | Hidase | 20/10/S | 90/50/MS-S | 100/60/MS-S | 100/80/MS-S |
| 3 | Danda’a | 10/2/MS | 60/35/MS-S | 100/50/MS-S | 100/60/MS-S |
| 4 | Kingbird | 5/2/MS | 60/30/MS-S | 100/40/MS-S | 100/60/MS-S |
| 5 | Pavon-76 | 5/1/MS | 50/30/MS-S | 100/50/MS-S | 100/50/MS |
| 6 | Shorima | 5/1/MS | 20/10/MS-S | 100/30/MS-S | 100/30/MS |
| 7 | Danda’a | T | 10/5/MS-S | 0/0/- | 0/0/- | 0/0/- |
| 8 | Kubsa | 5/2/MS | 10/5/MS | 0/0/- | 0/0/- |
| 9 | Hidase | 25/10/S | 10/5/MR | 0/0/- | 0/0/- |
| 10 | Shorima | 5/2/MS | 0/0/- | 0/0/- | 0/0/- |
| 11 | Pavon-76 | 5/1/MS | 0/0/- | 0/0/- | 0/0/- |
| 12 | Kingbird | 6/1/MS | 0/0/- | 0/0/- | 0/0/- |
| 13 | Shorima | 0/0/- | 0/0/- | 0/0/- | 0/0/- |
| 14 | Danda’a | 5/1/MS | 0/0/- | 0/0/- | 0/0/- |
| 15 | Kingbird | 0/0/- | 0/0/- | 0/0/- | 0/0/- |
| 16 | Pavon-76 | 0/0/- | 10/5/MR-MS | 0/0/- | 0/0/- |
| 17 | Kubsa | 5/2/MS | 5/5/MR-MS | 0/0/- | 0/0/- |
| 18 | Hidase | 25/10/S | 20/5/MR-MS | 10/5/MR | 0/0/- |
| 19 | Hidase | UT | 20/10/S | 100/40/MS-S | 100/70/MS-S | 100/80/S |
| 20 | Danda’a | 0/0/- | 50/25/MS-S | 80/50/MS-S | 100/60/MS-S |
| 21 | Kubsa | 10/5/MS | 60/35/MS | 100/60/S | 100/70/S |
| 22 | Shorima | 0/0/- | 45/15/MS | 50/30/MS-S | 100/30/MS |
| 23 | Pavon-76 | 5/1/MS | 45/20/MS-S | 60/40/MS-S | 100/50/MS |
| 24 | Kingbird | 10/5/MS | 70/40/MS-S | 80/50/MS-S | 100/50/MS-S |
| 25 | Danda’a | 10/5/MS | 60/30/MS-S | 100/60/S | 100/50/MS-S |
| 26 | Kubsa | 10/5/MS | 65/35/MS-S | 100/50/S | 100/60/S |
| 27 | Pavon-76 | 5/1/MS | 30/20/MS-S | 100/40/MS-S | 100/45/MS |
| 28 | Kingbird | 5/1/MS | 55/30/MS-S | 100/40/MS-S | 100/40/MS-S |
| 29 | Hidase | 40/20/S | 100/45/S | 100/70/S | 100/70/S |
| 30 | Shorima | 0/0/- | 40/20/MS-S | 60/30/MS-S | 100/30/MR-MS |
| 31 | Danda’a | T | 5/2/MS | 10/5/MR | 0/0/- | 0/0/- |
| 32 | Kubsa | 5/2/MS | 10/5/MR-MS | 20/10/MR-MS | 0/0/- |
| 33 | Shorima | 0/0/- | 10/5/MR-MS | 0/0/- | 0/0/- |
| 34 | Hidase | 30/15/S | 10/5/MR-MS | 10/5/MR-MS | 0/0/- |
| 35 | Kingbird | 5/1/MS | 10/5/MR-MS | 0/0/- | 0/0/- |
| 36 | Pavon-76 | 0/0/- | 0/0/- | 0/0/- | 0/0/- |

1 T: treated, fungicide treatment block; UT: untreated, non-fungicide treatment block;

2 S: susceptible; MS-S: moderately susceptible to susceptible; MS: moderately susceptible; MR-MS: moderately resistant to moderately susceptible; MR: moderately resistant [67].

S4b. Trial 2 – SR visual disease scoring results per plot, showing incidence in percentage, severity in percentage, and host plant reaction (on DAI 0, SR was not observed in the plots).

| **Plot** | **Variety** | **Block1** | **DAI 17** | **DAI 30** | **DAI 37** | **DAI 44** |
| --- | --- | --- | --- | --- | --- | --- |
| 37 | Kubsa | UT | 0/0/- | 50/25/MS-S | 100/40/MS-S | 100/45/MS-S |
| 38 | Hidase | 5/2/MS | 100/35/S | 100/50/MS-S | 100/50/MS-S |
| 39 | Danda’a | 5/2/MS | 25/10/MS | 60/40/MS-S | 100/40/MS-S |
| 40 | Kingbird | 0/0/- | 25/15/MS-S | 60/35/MS-S | 100/35/MS-S |
| 41 | Pavon-76 | 0/0/- | 25/5/MS | 30/5/MS-S | 100/20/MS |
| 42 | Shorima | 0/0/- | 30/10/MS | 40/15/MS-S | 100/25/MS |
| 43 | Danda’a | T | 0/0/- | 0/0/- | 0/0/- | 0/0/- |
| 44 | Kubsa | 0/0/- | 0/0/- | 0/0/- | 0/0/- |
| 45 | Hidase | 5/2/MS | 0/0/- | 0/0/- | 0/0/- |
| 46 | Shorima | 0/0/- | 0/0/- | 0/0/- | 0/0/- |
| 47 | Pavon-76 | 0/0/- | 0/0/- | 0/0/- | 0/0/- |
| 48 | Kingbird | 10/5/MS | 0/0/- | 0/0/- | 0/0/- |
| 49 | Shorima | 0/0/- | 0/0/- | 0/0/- | 0/0/- |
| 50 | Danda’a | 0/0/- | 0/0/- | 0/0/- | 0/0/- |
| 51 | Kingbird | 0/0/- | 0/0/- | 0/0/- | 0/0/- |
| 52 | Pavon-76 | 0/0/- | 0/0/- | 0/0/- | 0/0/- |
| 53 | Kubsa | 5/1/MS | 0/0/- | 0/0/- | 0/0/- |
| 54 | Hidase | 10/5/MS-S | 0/0/- | 0/0/- | 0/0/- |
| 55 | Hidase | UT | 0/0/- | 80/40/S | 100/60/S | 100/70/S |
| 56 | Danda’a | 0/0/- | 20/5/MS-S | 40/25/MS-S | 100/30/MS |
| 57 | Kubsa | 0/0/- | 25/10/MS | 90/45/MS-S | 100/50/MS-S |
| 58 | Shorima | 0/0/- | 20/10/MS | 60/35/MS-S | 100/35/MS |
| 59 | Pavon-76 | 0/0/- | 30/15/MS-S | 90/40/MS-S | 100/40/MS |
| 60 | Kingbird | 15/5/MS | 40/25/MS | 100/40/MS-S | 100/50/MS |
| 61 | Danda’a | 0/0/- | 20/10/MS-S | 100/50/S | 100/40/MS-S |
| 62 | Kubsa | 0/0/- | 20/10/MS | 100/40/MS-S | 100/50/MS-S |
| 63 | Pavon-76 | 0/0/- | 20/10/MS | 60/30/MS-S | 100/30/MS |
| 64 | Kingbird | 10/5/MS-S | 0/0/- | 90/40/MS-S | 100/40/MS |
| 65 | Hidase | 0/0/- | 80/35/MS-S | 100/60/S | 100/60/S |
| 66 | Shorima | 0/0/- | 20/5/MS-S | 30/15/MS-S | 100/30/MS |
| 67 | Danda’a | T | 0/0/- | 0/0/- | 0/0/- | 0/0/- |
| 68 | Kubsa | 5/2/MS | 0/0/- | 0/0/- | 0/0/- |
| 69 | Shorima | 0/0/- | 0/0/- | 0/0/- | 0/0/- |
| 70 | Hidase | 30/15/S | 0/0/- | 0/0/- | 0/0/- |
| 71 | Kingbird | 0/0/- | 0/0/- | 0/0/- | 0/0/- |
| 72 | Pavon-76 | 0/0/- | 0/0/- | 0/0/- | 0/0/- |

1 T: treated, fungicide treatment block; UT: untreated, non-fungicide treatment block;

2 S: susceptible; MS-S: moderately susceptible to susceptible; MS: moderately susceptible; MR-MS: moderately resistant to moderately susceptible; MR: moderately resistant [67].


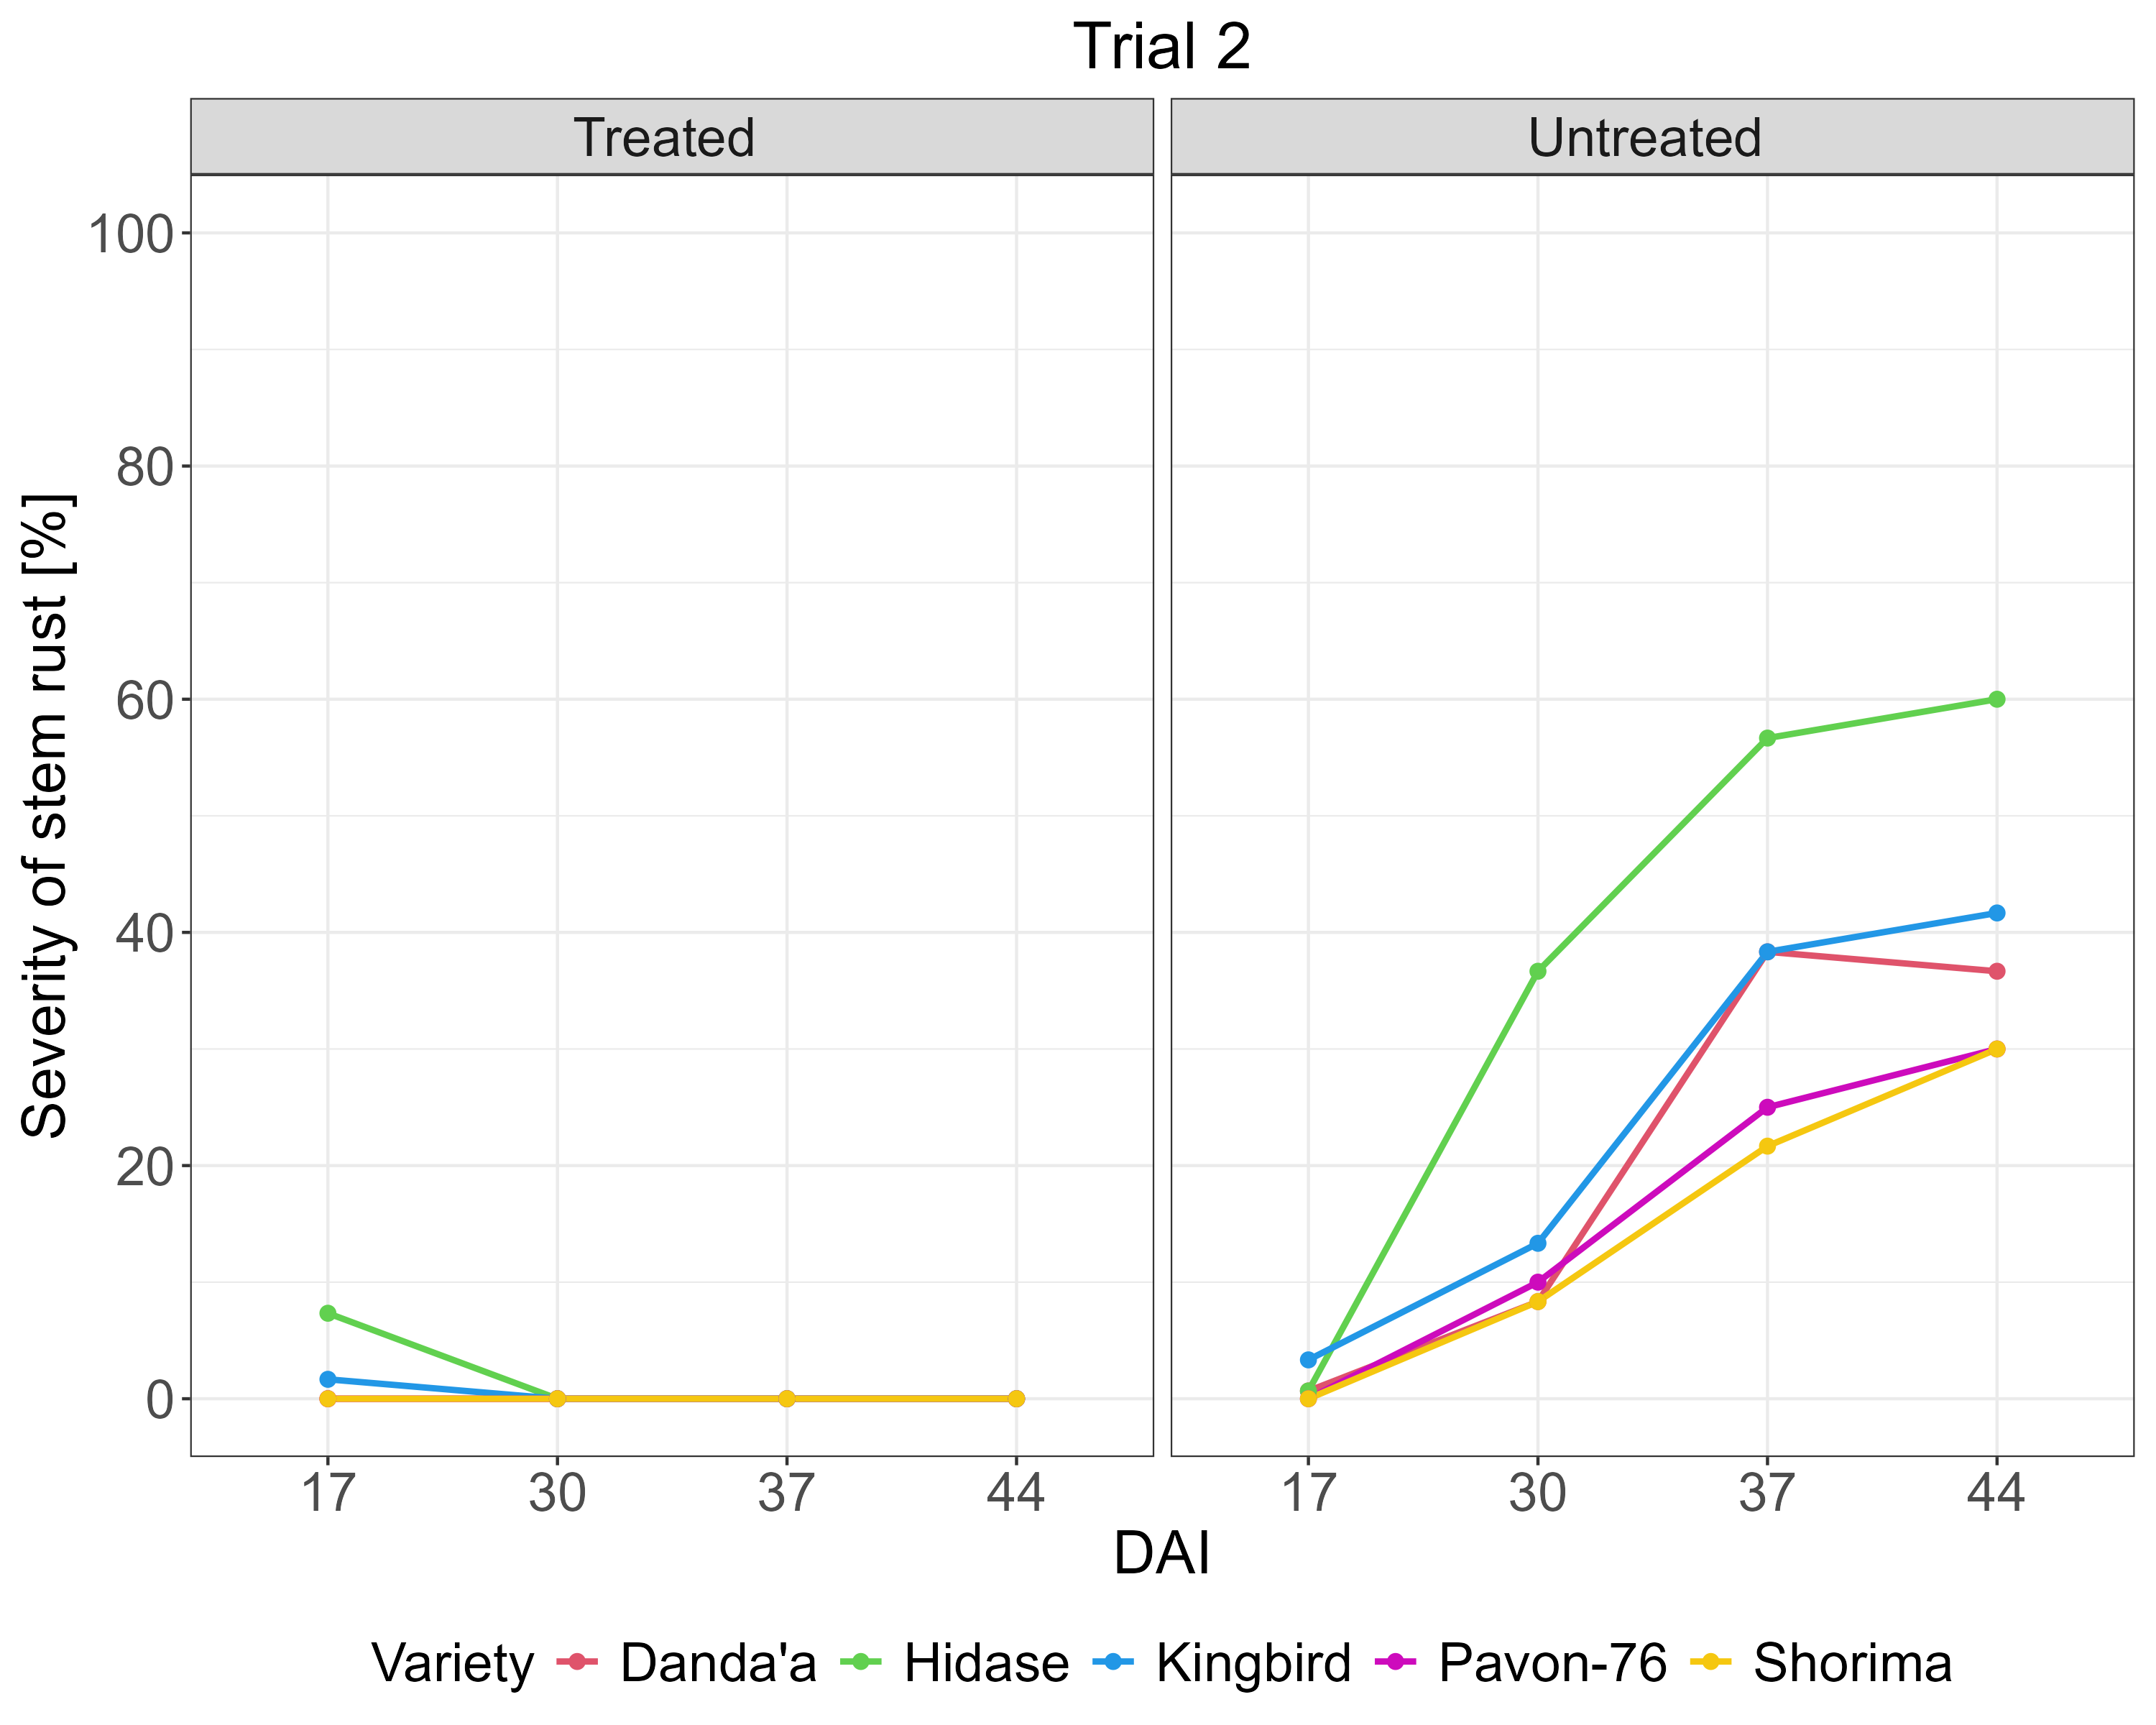

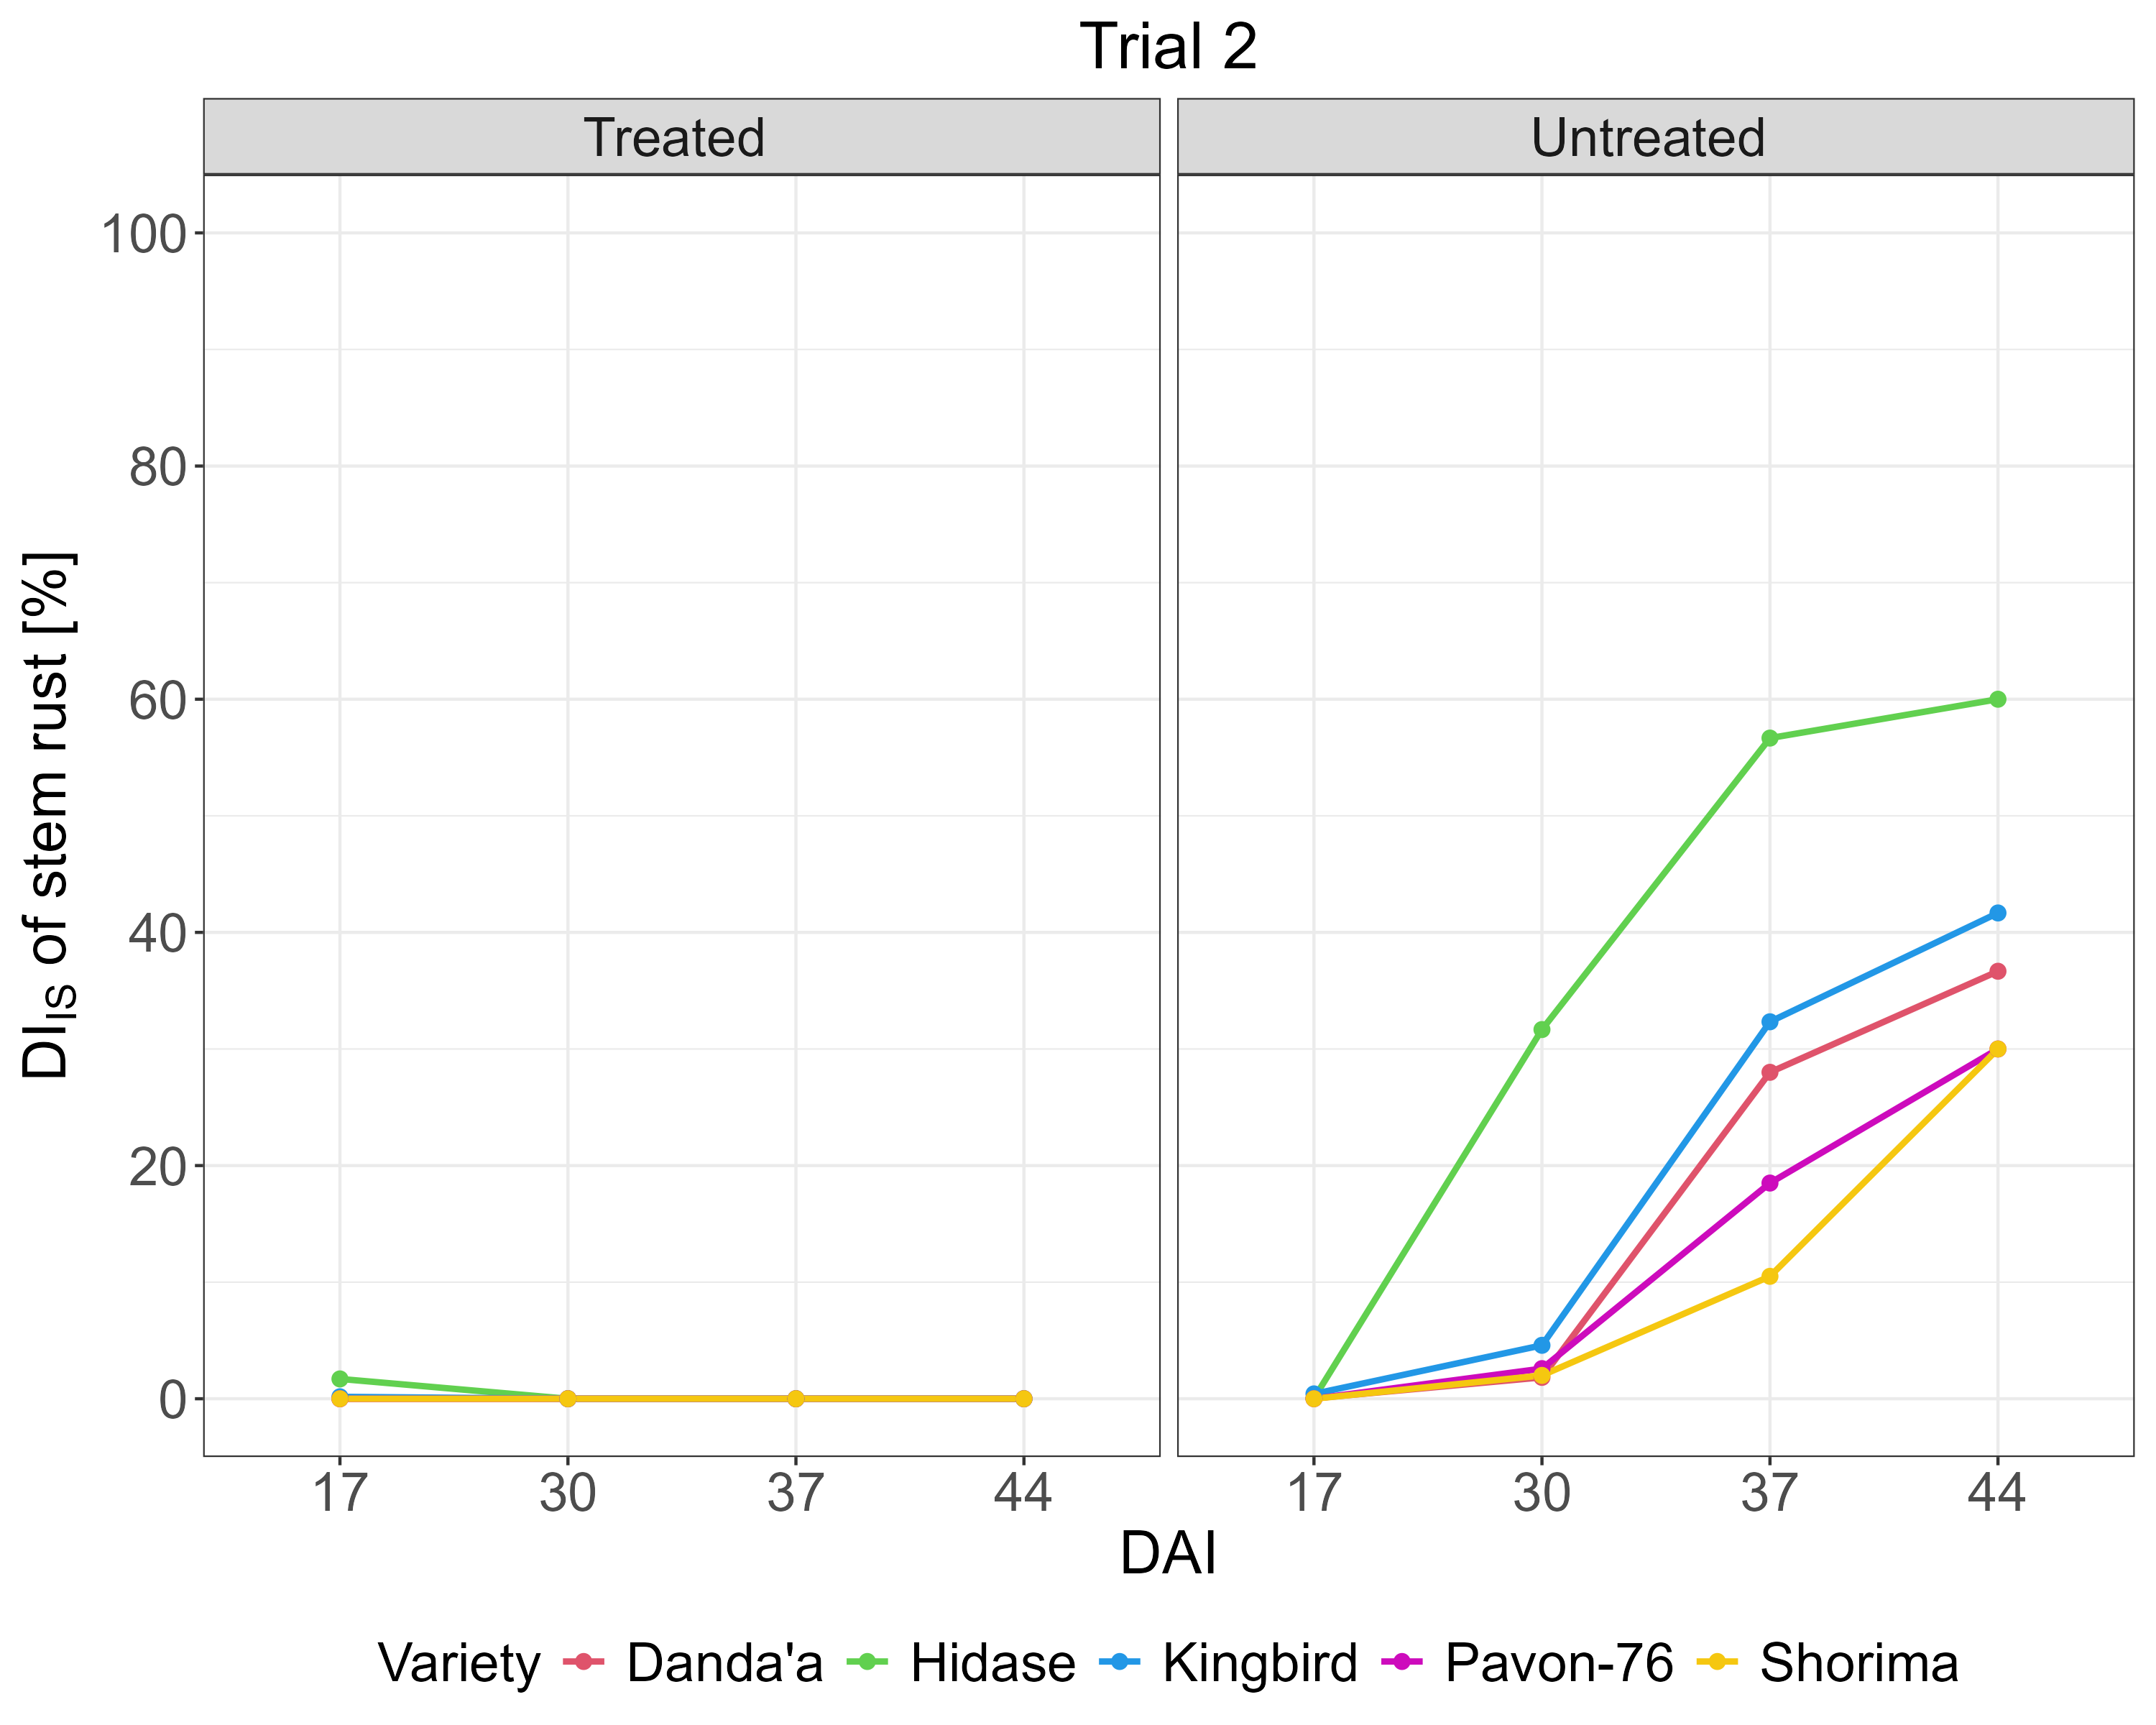

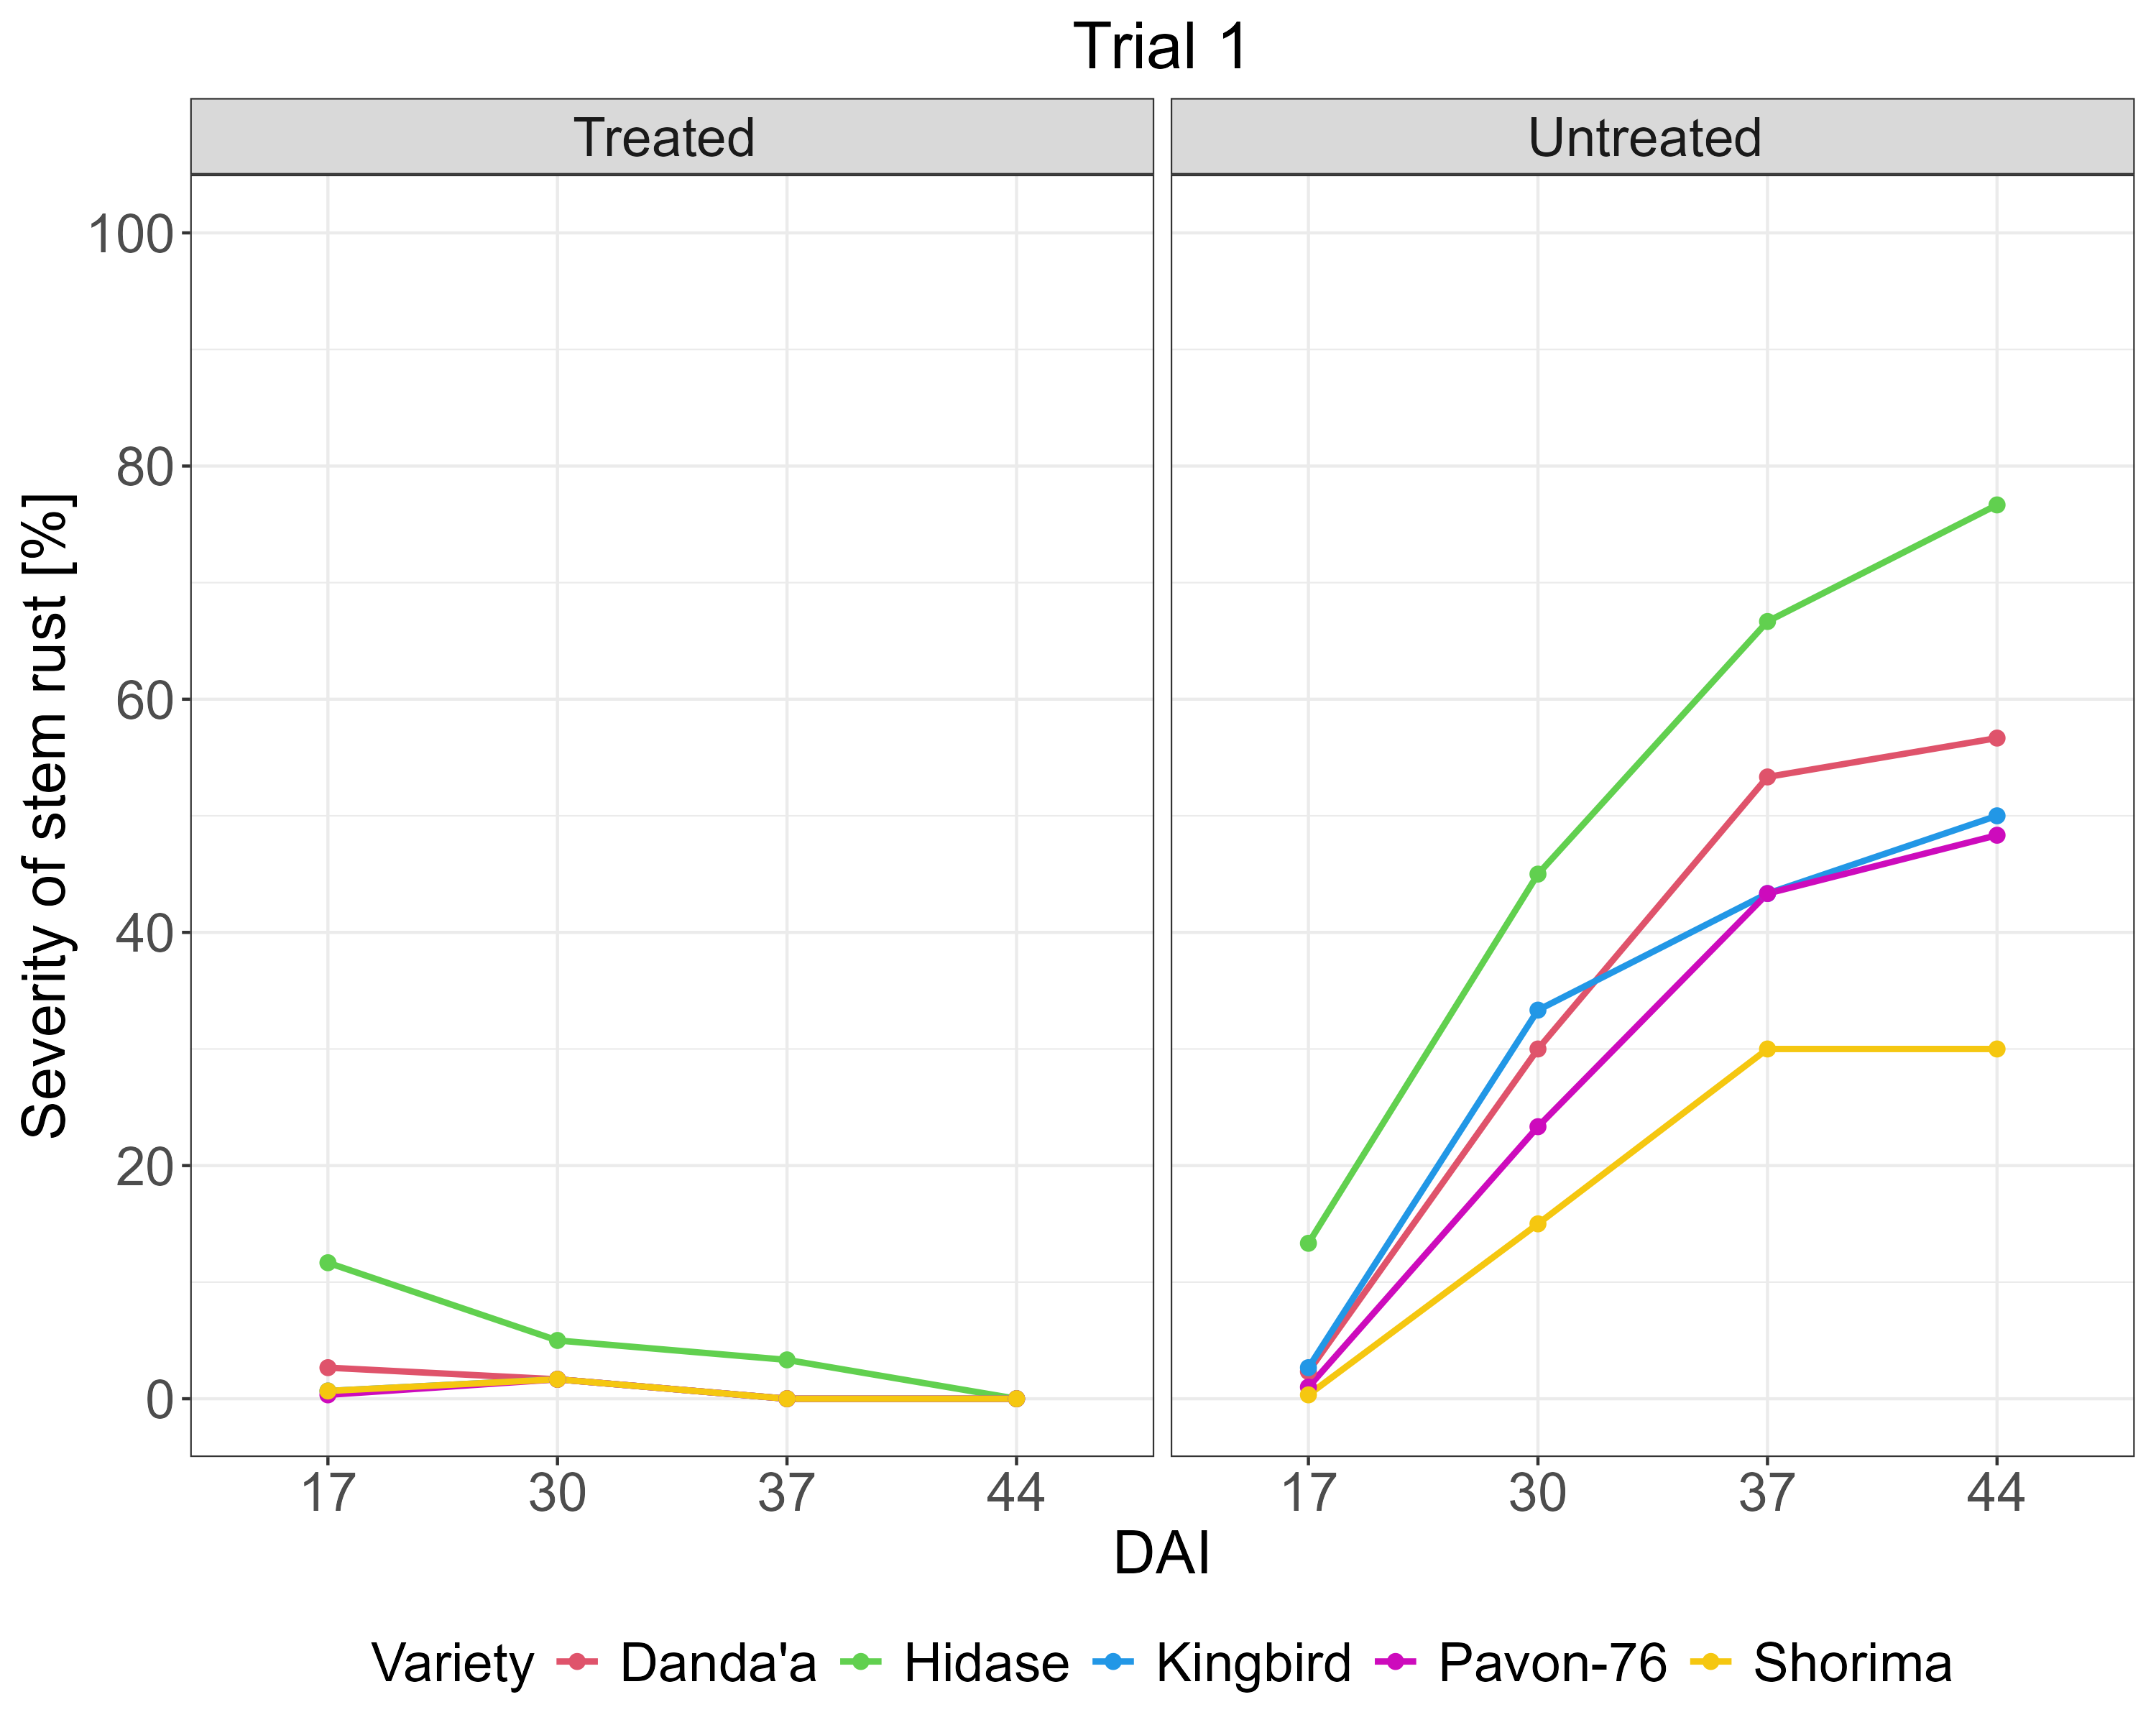

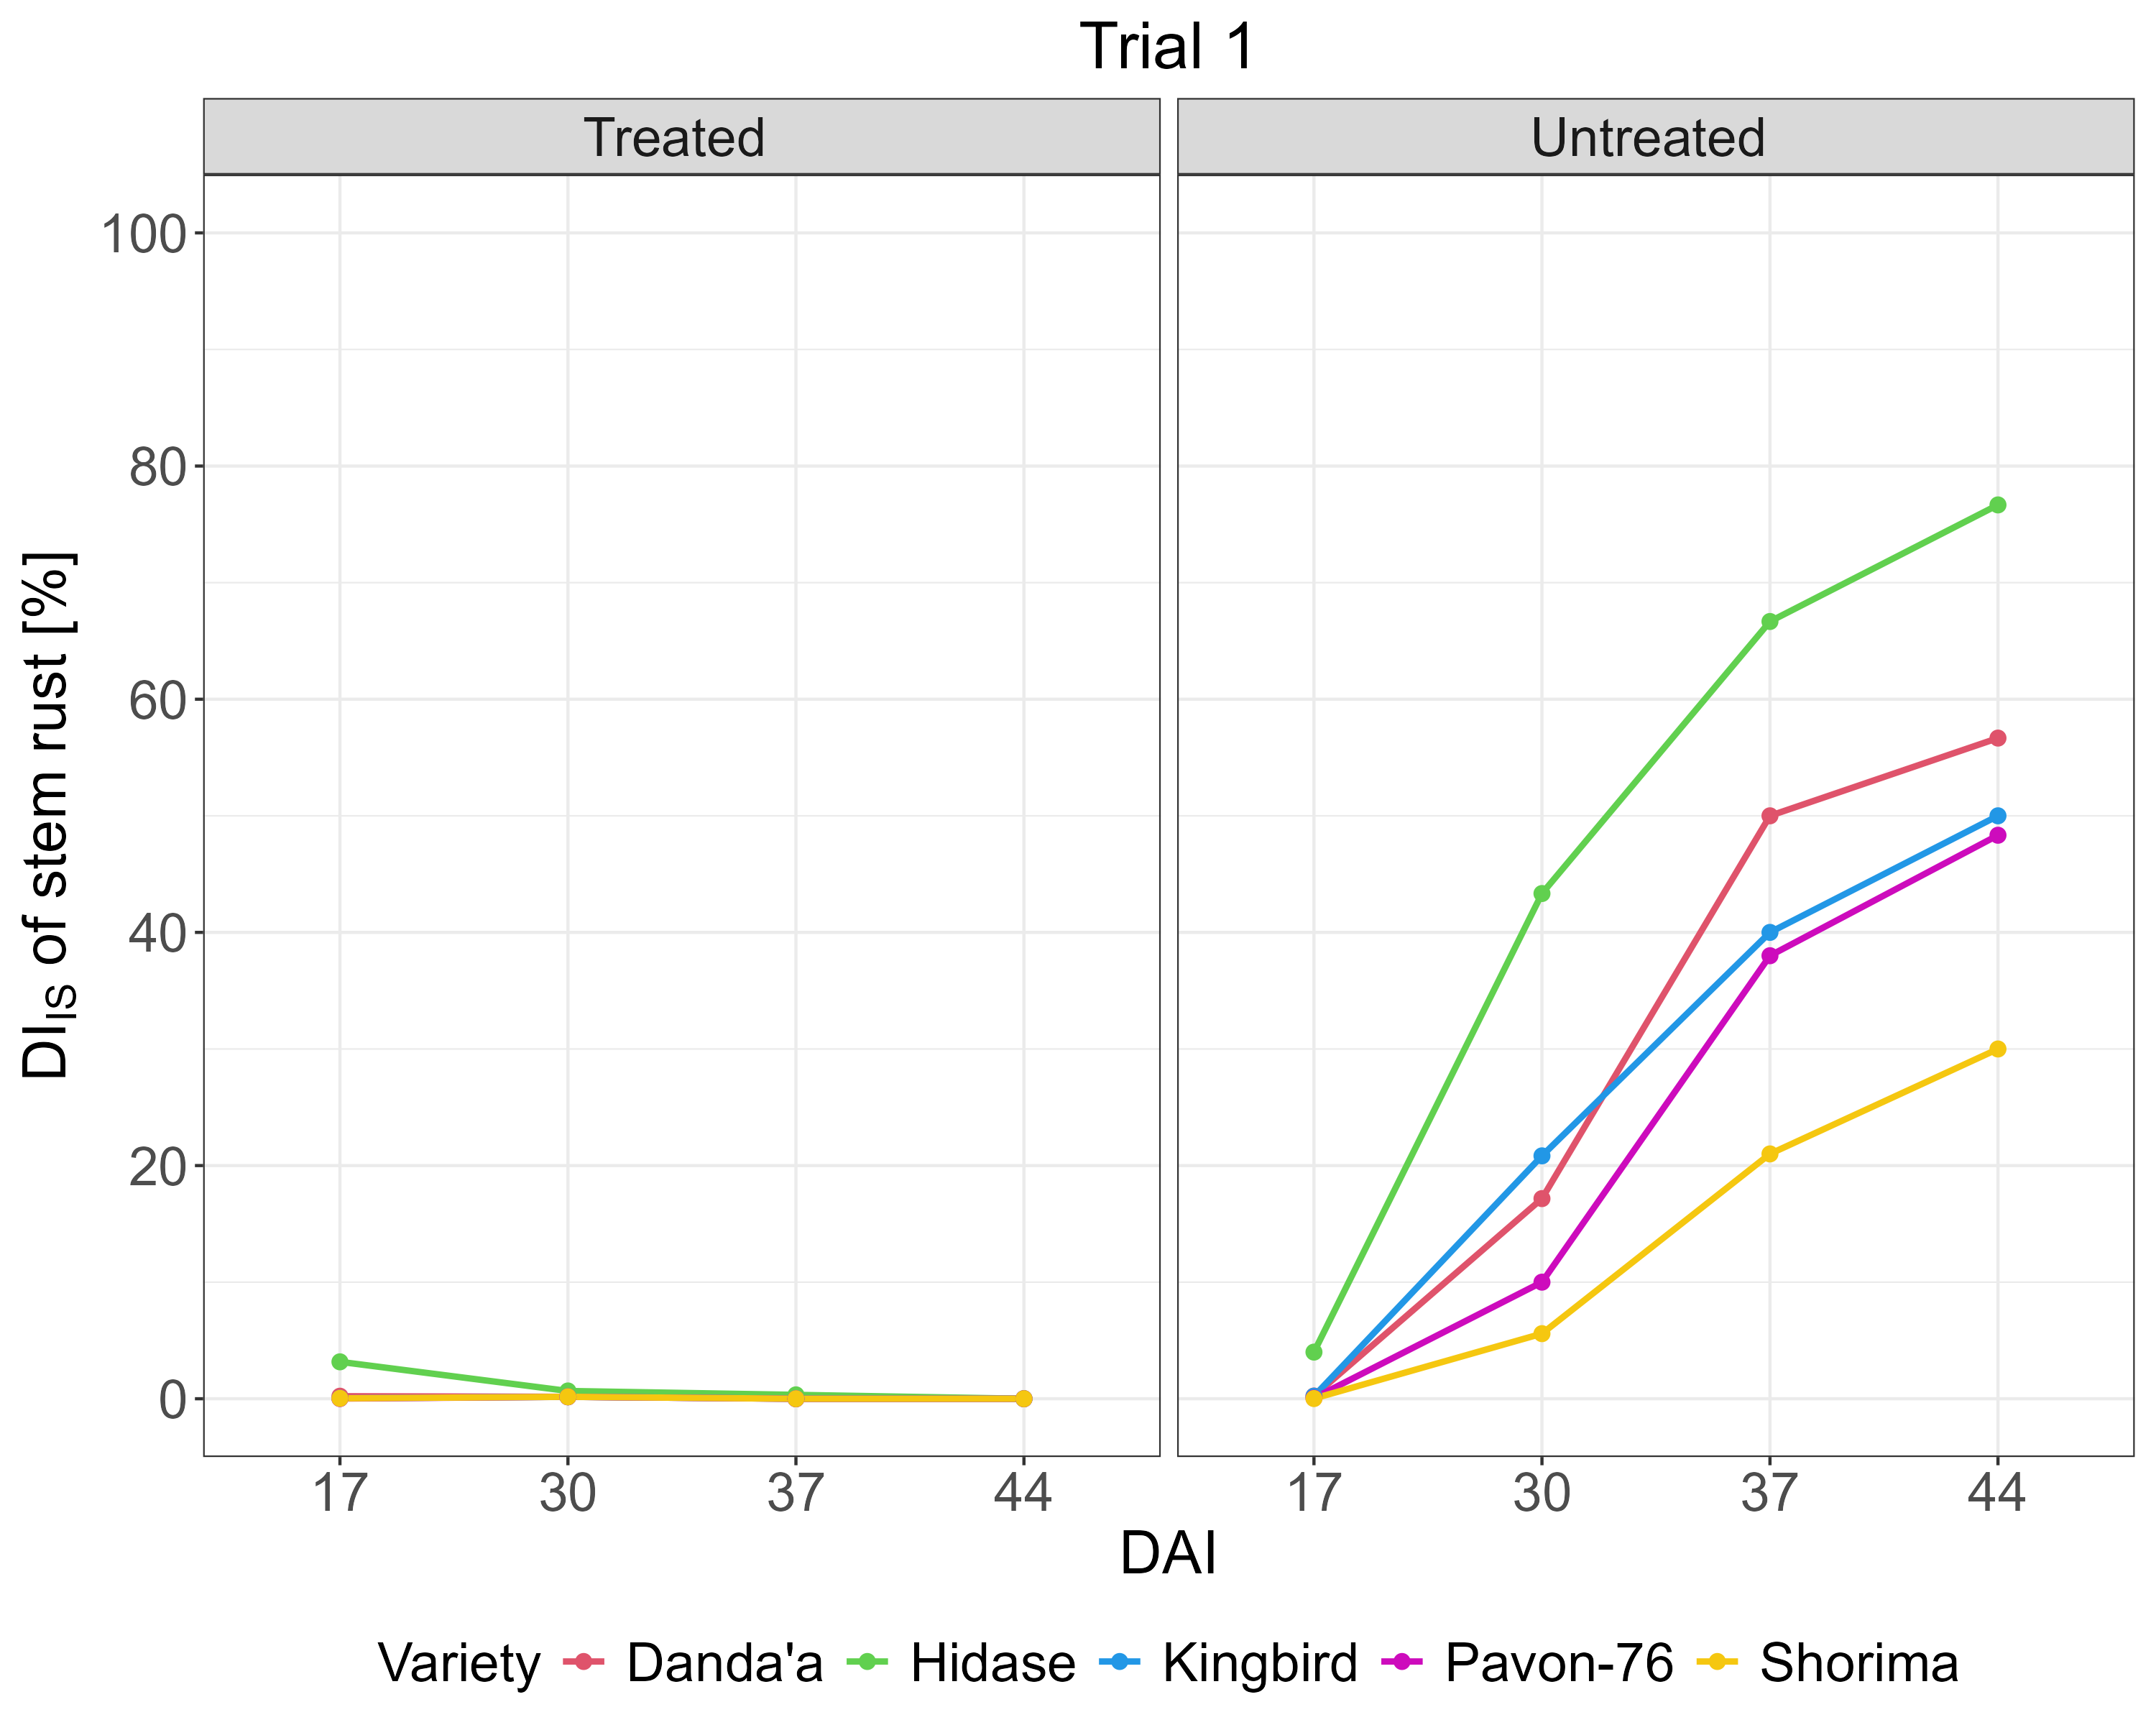


**a)**

**b)**

**c)**

**d)**

S5. SR disease progression per wheat variety and treatment block for Trials 1 and 2 – severity (**a**, **b**) and DIIS (**c**, **d**) (note: variety Kubsa was excluded).

Trial 2


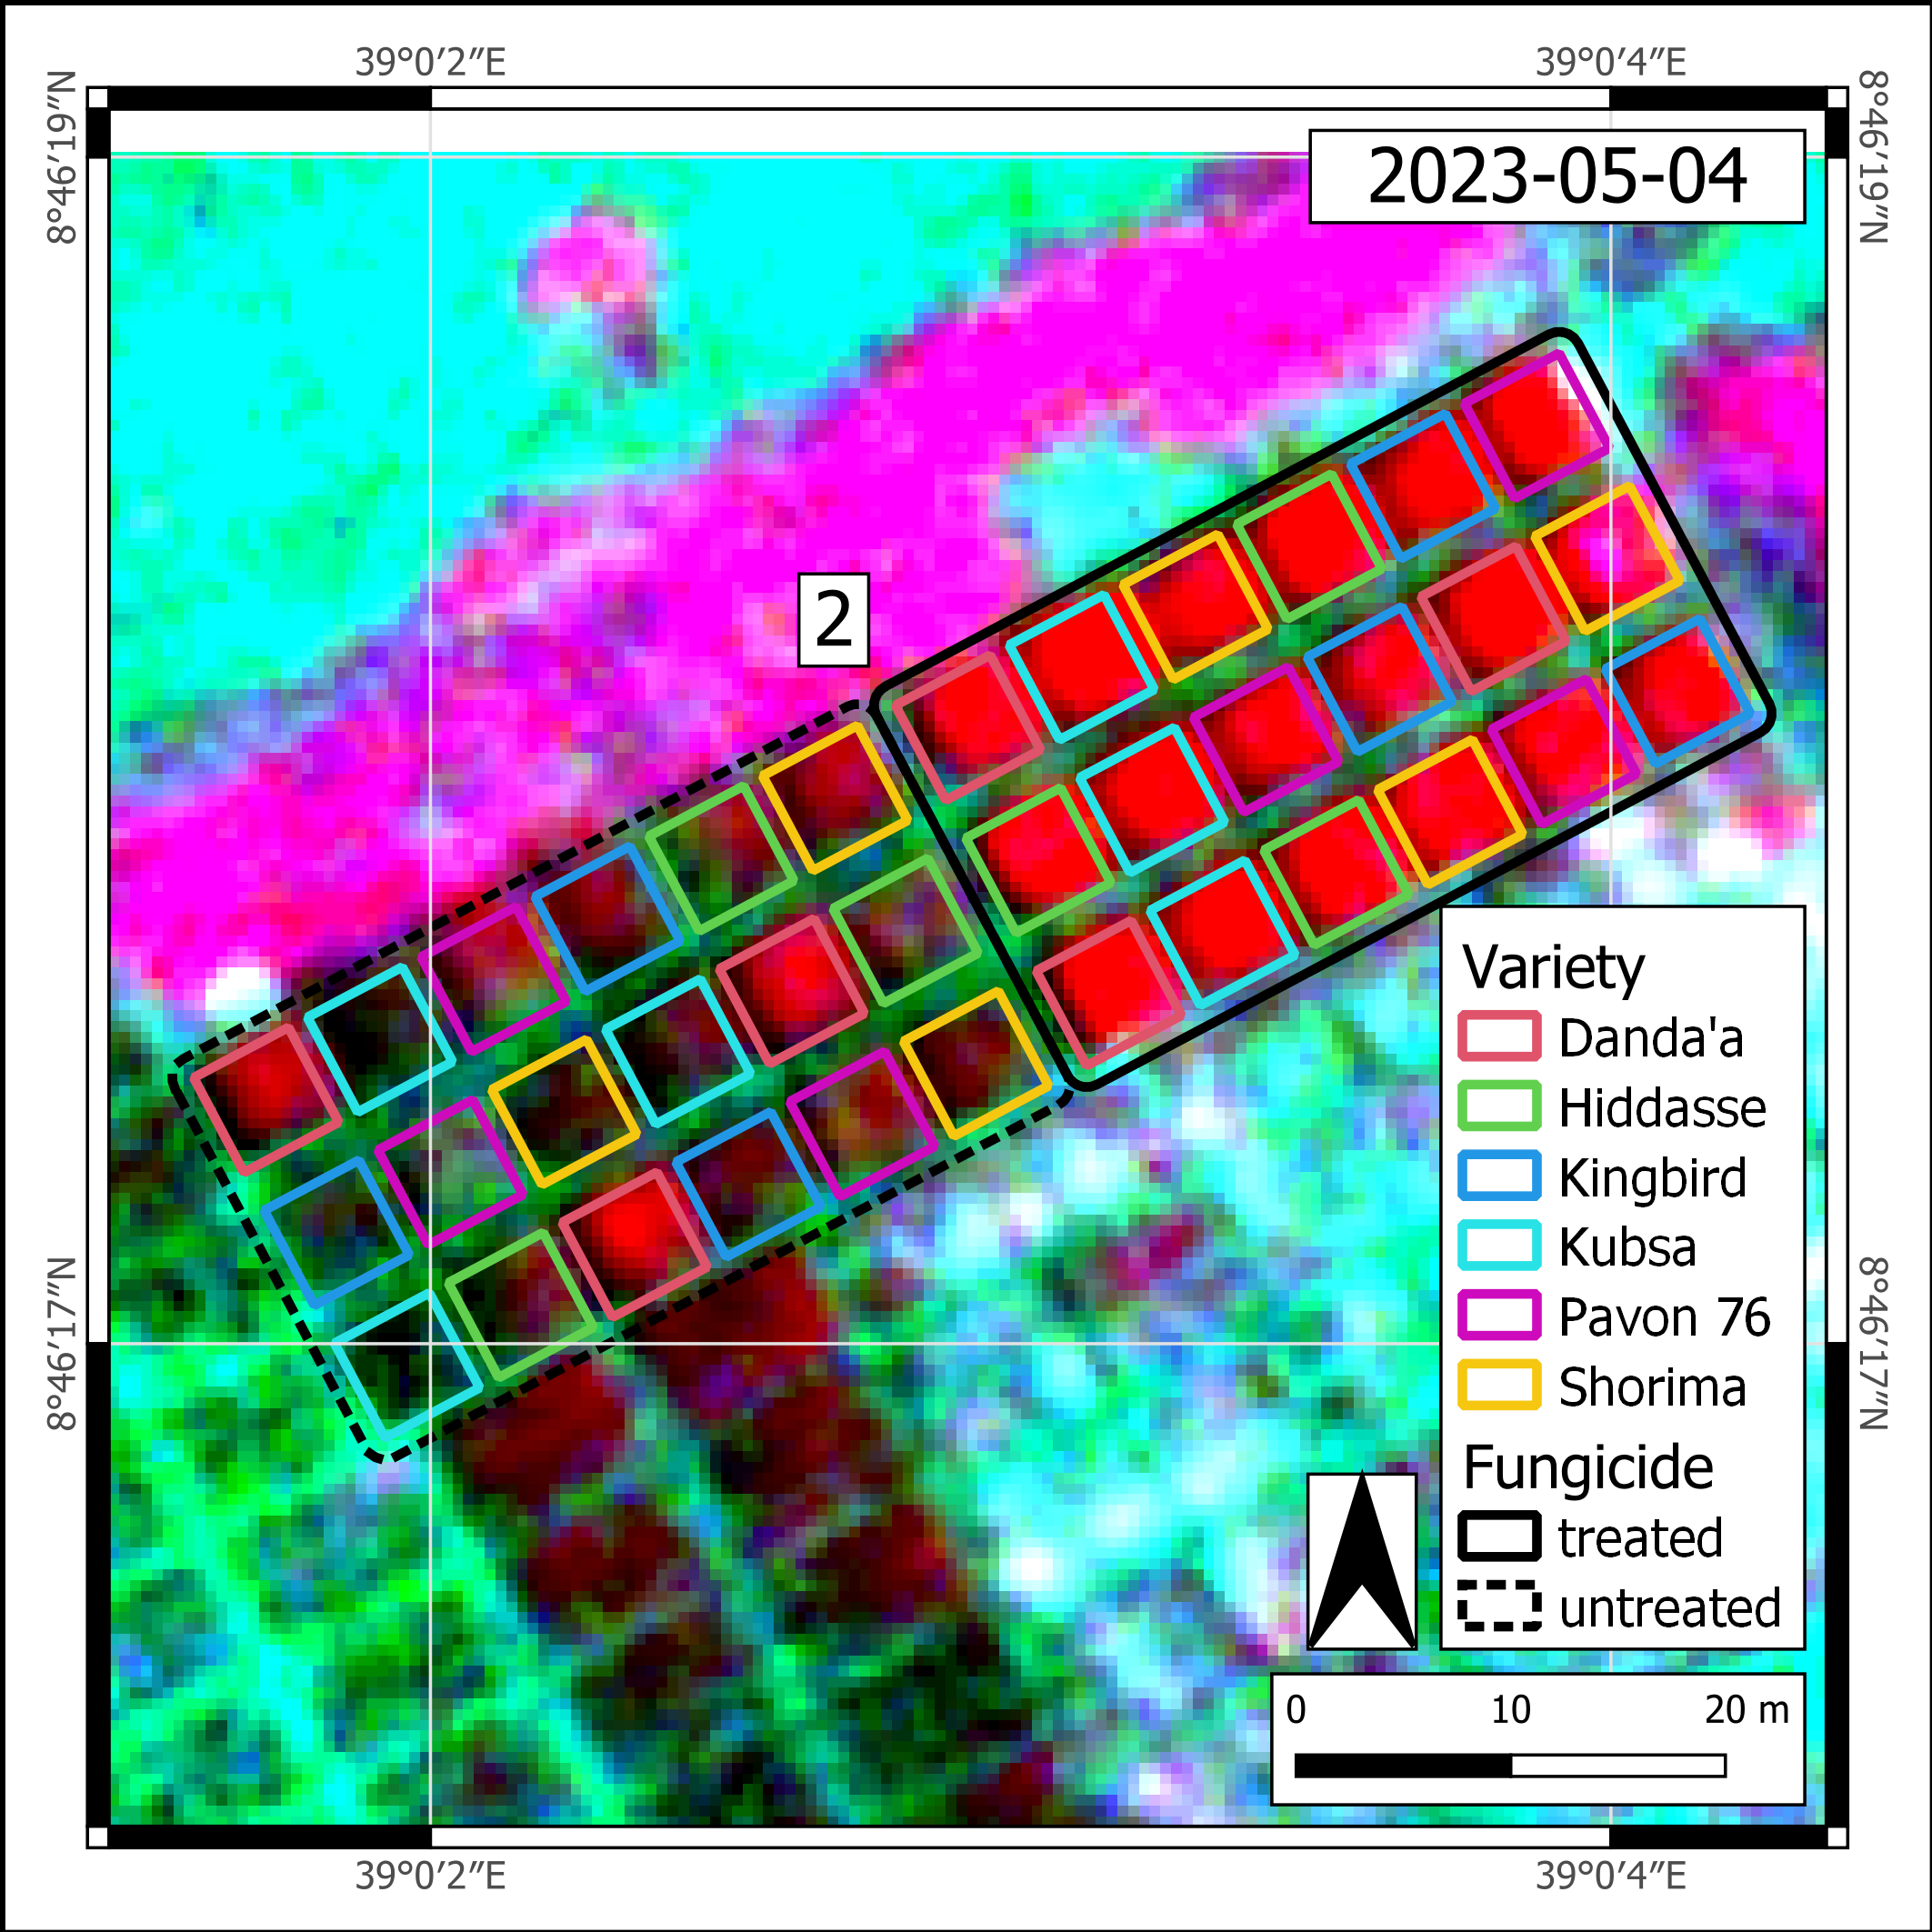


Trial 1


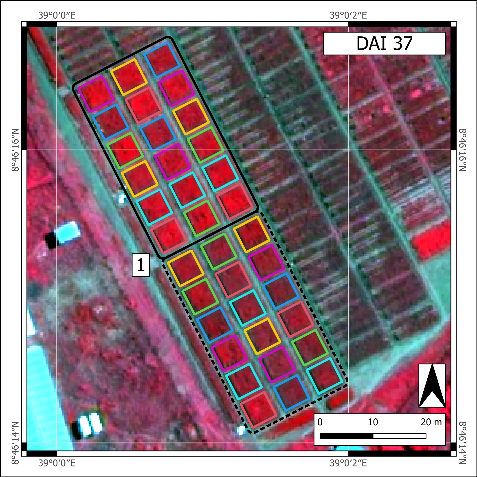

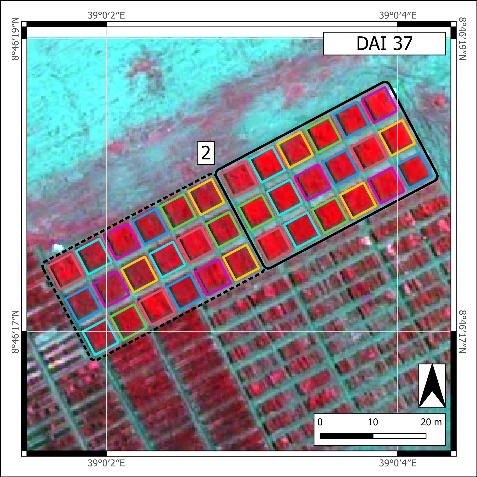

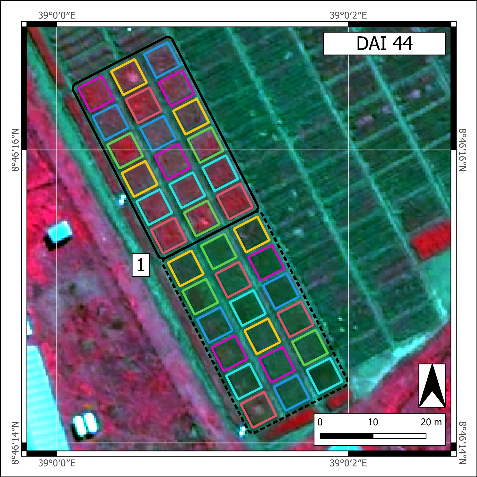

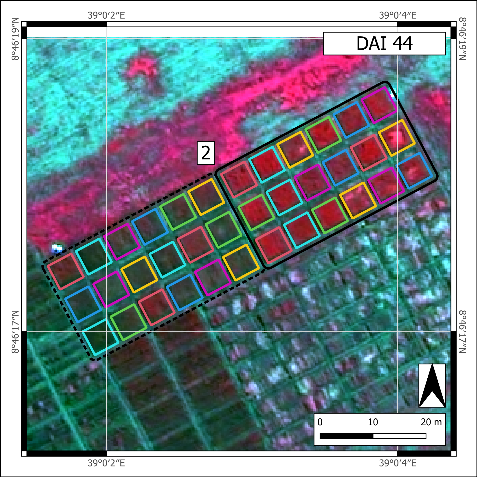


S6. The spectral signal derived from Pleiades-Neo time series reveals wheat canopy changes (Pleiades-Neo false color composites using near-infrared, red, and green bands from corresponding DAIs). Figures prepared using QGIS version 3.28.11-Firenze.

S7a. SkySat – Trial 1 – Pearson correlation analysis between DIISHR and spectral features at each DAI (untreated block) (*P* = p-value; **P* < 0.05; ***P* < 0.01).

| **Spectral feature** | **SKYSAT** | | | | | | | |
| --- | --- | --- | --- | --- | --- | --- | --- | --- |
| **DAI 17** | | **DAI 30** | | **DAI 37** | | **DAI 44** | |
| **Healthy** | | **Moderately Diseased** | | **Severely Diseased** | | **Fully Diseased** | |
| **r** | ***P*** | **r** | ***P*** | **r** | ***P*** | **r** | ***P*** |
| **B** | -0.33 | 0.235 | -0.48 | 0.069 | -0.45 | 0.095 | -0.05 | 0.855 |
| **G** | -0.29 | 0.296 | -0.10 | 0.734 | -0.44 | 0.097 | -0.23 | 0.399 |
| **R** | -0.47 | 0.076 | -0.28 | 0.304 | -0.10 | 0.731 | 0.33 | 0.235 |
| **NIR** | 0.35 | 0.198 | 0.01 | 0.966 | 0.12 | 0.674 | -0.23 | 0.419 |
| **CIG** | 0.40 | 0.136 | 0.06 | 0.844 | 0.32 | 0.240 | -0.14 | 0.619 |
| **CVI** | 0.25 | 0.363 | -0.06 | 0.828 | 0.58* | 0.023 | 0.19 | 0.493 |
| **GLI** | 0.38 | 0.164 | 0.6* | 0.019 | -0.33 | 0.228 | -0.51 | 0.052 |
| **MSAVI2** | 0.42 | 0.114 | 0.13 | 0.644 | 0.10 | 0.717 | -0.31 | 0.254 |
| **MSR** | 0.48 | 0.073 | 0.14 | 0.609 | 0.12 | 0.673 | -0.28 | 0.304 |
| **OSAVI** | 0.43 | 0.110 | 0.13 | 0.638 | 0.11 | 0.709 | -0.30 | 0.269 |
| **RDVI** | 0.39 | 0.154 | 0.06 | 0.821 | 0.11 | 0.688 | -0.27 | 0.323 |
| **SAVI** | 0.43 | 0.110 | 0.13 | 0.638 | 0.11 | 0.709 | -0.30 | 0.269 |
| **TVI** | 0.43 | 0.111 | 0.13 | 0.640 | 0.10 | 0.712 | -0.31 | 0.263 |
| **RSI(B,G)** | -0.32 | 0.248 | -0.58* | 0.023 | -0.38 | 0.164 | 0.06 | 0.837 |
| **RSI(B,R)** | -0.31 | 0.263 | -0.38 | 0.163 | -0.38 | 0.161 | -0.22 | 0.438 |
| **RSI(B,NIR)** | -0.35 | 0.195 | -0.28 | 0.307 | -0.56* | 0.031 | 0.15 | 0.589 |
| **RSI(G,B)** | 0.41 | 0.130 | 0.63* | 0.012 | 0.54* | 0.037 | -0.07 | 0.802 |
| **RSI(G,R)** | 0.39 | 0.156 | 0.40 | 0.135 | -0.41 | 0.129 | -0.52* | 0.045 |
| **RSI(G,NIR)** | -0.38 | 0.159 | -0.04 | 0.891 | -0.30 | 0.273 | 0.15 | 0.597 |
| **RSI(R,B)** | 0.26 | 0.342 | 0.45 | 0.092 | 0.56* | 0.029 | 0.25 | 0.364 |
| **RSI(R,G)** | -0.33 | 0.236 | -0.40 | 0.141 | 0.42 | 0.124 | 0.54* | 0.039 |
| **RSI(R,NIR)** | -0.42 | 0.114 | -0.13 | 0.644 | -0.10 | 0.717 | 0.31 | 0.254 |
| **RSI(NIR,B)** | 0.56* | 0.031 | 0.34 | 0.217 | 0.6* | 0.019 | -0.14 | 0.610 |
| **RSI(NIR,G)** | 0.40 | 0.136 | 0.06 | 0.844 | 0.32 | 0.240 | -0.14 | 0.619 |
| **RSI(NIR,R)** | 0.49 | 0.061 | 0.15 | 0.597 | 0.12 | 0.658 | -0.27 | 0.323 |
| **NDSI(B,G)** | -0.32 | 0.239 | -0.59* | 0.019 | -0.40 | 0.141 | 0.06 | 0.827 |
| **NDSI(B,R)** | -0.31 | 0.258 | -0.40 | 0.143 | -0.40 | 0.137 | -0.22 | 0.421 |
| **NDSI(B,NIR)** | -0.35 | 0.194 | -0.29 | 0.301 | -0.56* | 0.031 | 0.15 | 0.589 |
| **NDSI(G,B)** | 0.32 | 0.239 | 0.59* | 0.019 | 0.40 | 0.141 | -0.06 | 0.827 |
| **NDSI(G,R)** | 0.36 | 0.193 | 0.40 | 0.138 | -0.41 | 0.126 | -0.53* | 0.042 |
| **NDSI(G,NIR)** | -0.38 | 0.157 | -0.04 | 0.886 | -0.31 | 0.269 | 0.15 | 0.600 |
| **NDSI(R,B)** | 0.31 | 0.258 | 0.40 | 0.143 | 0.40 | 0.137 | 0.22 | 0.421 |
| **NDSI(R,G)** | -0.36 | 0.193 | -0.40 | 0.138 | 0.41 | 0.126 | 0.53* | 0.042 |
| **NDSI(R,NIR)** | -0.43 | 0.110 | -0.13 | 0.638 | -0.11 | 0.709 | 0.30 | 0.269 |
| **NDSI(NIR,B)** | 0.35 | 0.194 | 0.29 | 0.301 | 0.56* | 0.031 | -0.15 | 0.589 |
| **NDSI(NIR,G)** | 0.38 | 0.157 | 0.04 | 0.886 | 0.31 | 0.269 | -0.15 | 0.600 |
| **NDSI(NIR,R)** | 0.43 | 0.110 | 0.13 | 0.638 | 0.11 | 0.709 | -0.30 | 0.269 |

green: healthy (avg. DIISHR <1%); orange: moderately diseased (avg. DIISHR 15-29.9%); red: severely diseased (avg. DIISHR 30-44.9%); and grey: fully damaged (avg. DIISHR ≥45%).

S7b. SkySat – Trial 2 – Pearson correlation analysis between DIISHR and spectral features at each DAI (untreated block) (*P* = p-value; **P* < 0.05; ***P* < 0.01).

| **Spectral feature** | **SKYSAT** | | | | | | | |
| --- | --- | --- | --- | --- | --- | --- | --- | --- |
| **DAI 17** | | **DAI 30** | | **DAI 37** | | **DAI 44** | |
| **Healthy** | | **Mildly Diseased** | | **Moderately Diseased** | | **Severely Diseased** | |
| **r** | ***P*** | **r** | ***P*** | **r** | ***P*** | **r** | ***P*** |
| **B** | -0.03 | 0.918 | -0.50 | 0.060 | -0.58* | 0.025 | -0.10 | 0.729 |
| **G** | 0.34 | 0.222 | -0.30 | 0.277 | -0.11 | 0.699 | 0.16 | 0.572 |
| **R** | -0.05 | 0.853 | -0.17 | 0.546 | 0.10 | 0.728 | 0.29 | 0.303 |
| **NIR** | -0.06 | 0.820 | 0.13 | 0.634 | -0.23 | 0.404 | -0.24 | 0.387 |
| **CIG** | -0.22 | 0.436 | 0.23 | 0.401 | -0.12 | 0.671 | -0.24 | 0.384 |
| **CVI** | -0.46 | 0.088 | 0.34 | 0.211 | 0.02 | 0.937 | -0.18 | 0.522 |
| **GLI** | 0.27 | 0.339 | 0.22 | 0.431 | 0.03 | 0.911 | -0.23 | 0.409 |
| **MSAVI2** | 0.03 | 0.927 | 0.18 | 0.532 | -0.18 | 0.522 | -0.28 | 0.313 |
| **MSR** | -0.03 | 0.908 | 0.16 | 0.568 | -0.19 | 0.487 | -0.27 | 0.324 |
| **OSAVI** | 0.02 | 0.948 | 0.17 | 0.537 | -0.18 | 0.515 | -0.28 | 0.315 |
| **RDVI** | -0.03 | 0.902 | 0.15 | 0.583 | -0.21 | 0.444 | -0.26 | 0.343 |
| **SAVI** | 0.02 | 0.948 | 0.17 | 0.537 | -0.18 | 0.515 | -0.28 | 0.315 |
| **TVI** | 0.02 | 0.941 | 0.17 | 0.535 | -0.18 | 0.518 | -0.28 | 0.314 |
| **RSI(B,G)** | -0.02 | 0.947 | -0.51 | 0.050 | -0.68** | 0.006 | -0.16 | 0.568 |
| **RSI(B,R)** | 0.03 | 0.904 | -0.52* | 0.049 | -0.66** | 0.008 | -0.27 | 0.334 |
| **RSI(B,NIR)** | -0.05 | 0.867 | -0.40 | 0.137 | -0.44 | 0.097 | 0.14 | 0.608 |
| **RSI(G,B)** | 0.02 | 0.956 | 0.51 | 0.054 | 0.7** | 0.003 | 0.12 | 0.659 |
| **RSI(G,R)** | 0.28 | 0.304 | -0.05 | 0.856 | -0.28 | 0.315 | -0.29 | 0.286 |
| **RSI(G,NIR)** | 0.19 | 0.498 | -0.23 | 0.404 | 0.12 | 0.673 | 0.25 | 0.361 |
| **RSI(R,B)** | -0.11 | 0.703 | 0.57* | 0.027 | 0.71** | 0.003 | 0.25 | 0.367 |
| **RSI(R,G)** | -0.28 | 0.303 | 0.04 | 0.891 | 0.28 | 0.319 | 0.30 | 0.272 |
| **RSI(R,NIR)** | -0.03 | 0.927 | -0.18 | 0.532 | 0.18 | 0.522 | 0.28 | 0.313 |
| **RSI(NIR,B)** | -0.11 | 0.692 | 0.43 | 0.114 | 0.52* | 0.045 | -0.19 | 0.506 |
| **RSI(NIR,G)** | -0.22 | 0.436 | 0.23 | 0.401 | -0.12 | 0.671 | -0.24 | 0.384 |
| **RSI(NIR,R)** | -0.05 | 0.858 | 0.15 | 0.582 | -0.20 | 0.477 | -0.27 | 0.330 |
| **NDSI(B,G)** | -0.02 | 0.953 | -0.51 | 0.051 | -0.68** | 0.005 | -0.15 | 0.587 |
| **NDSI(B,R)** | 0.03 | 0.904 | -0.53* | 0.043 | -0.67** | 0.007 | -0.26 | 0.340 |
| **NDSI(B,NIR)** | -0.05 | 0.870 | -0.40 | 0.135 | -0.45 | 0.096 | 0.15 | 0.601 |
| **NDSI(G,B)** | 0.02 | 0.953 | 0.51 | 0.051 | 0.68** | 0.005 | 0.15 | 0.587 |
| **NDSI(G,R)** | 0.28 | 0.304 | -0.05 | 0.872 | -0.28 | 0.317 | -0.30 | 0.280 |
| **NDSI(G,NIR)** | 0.19 | 0.491 | -0.23 | 0.403 | 0.12 | 0.672 | 0.25 | 0.363 |
| **NDSI(R,B)** | -0.03 | 0.904 | 0.53* | 0.043 | 0.67** | 0.007 | 0.26 | 0.340 |
| **NDSI(R,G)** | -0.28 | 0.304 | 0.05 | 0.872 | 0.28 | 0.317 | 0.30 | 0.280 |
| **NDSI(R,NIR)** | -0.02 | 0.948 | -0.17 | 0.537 | 0.18 | 0.515 | 0.28 | 0.315 |
| **NDSI(NIR,B)** | 0.05 | 0.870 | 0.40 | 0.135 | 0.45 | 0.096 | -0.15 | 0.601 |
| **NDSI(NIR,G)** | -0.19 | 0.491 | 0.23 | 0.403 | -0.12 | 0.672 | -0.25 | 0.363 |
| **NDSI(NIR,R)** | 0.02 | 0.948 | 0.17 | 0.537 | -0.18 | 0.515 | -0.28 | 0.315 |

green: healthy (avg. DIISHR <1%); yellow: mildly diseased (avg. DIISHR 1-14.9%); orange: moderately diseased (avg. DIISHR 15-29.9%); and red: severely diseased (avg. DIISHR 30-44.9%).

S8a. SkySat – Trial 1 – Pearson correlation analysis between severity and spectral features at each DAI (untreated block) (*P* = p-value; **P* < 0.05; ***P* < 0.01).

| **Spectral feature** | **SKYSAT** | | | | | | | |
| --- | --- | --- | --- | --- | --- | --- | --- | --- |
| **DAI 17** | | **DAI 30** | | **DAI 37** | | **DAI 44** | |
| **Healthy** | | **Moderately Diseased** | | **Severely Diseased** | | **Fully Diseased** | |
| **r** | ***P*** | **r** | ***P*** | **r** | ***P*** | **r** | ***P*** |
| **B** | -0.38 | 0.158 | -0.40 | 0.141 | -0.39 | 0.148 | -0.03 | 0.914 |
| **G** | -0.25 | 0.363 | 0.03 | 0.904 | -0.24 | 0.397 | -0.19 | 0.489 |
| **R** | -0.51 | 0.050 | -0.17 | 0.544 | 0.08 | 0.769 | 0.38 | 0.163 |
| **NIR** | 0.39 | 0.152 | -0.06 | 0.835 | 0.00 | 0.997 | -0.26 | 0.352 |
| **CIG** | 0.41 | 0.131 | -0.05 | 0.851 | 0.13 | 0.636 | -0.19 | 0.492 |
| **CVI** | 0.21 | 0.457 | -0.17 | 0.550 | 0.38 | 0.160 | 0.13 | 0.647 |
| **GLI** | 0.51 | 0.053 | 0.58* | 0.024 | -0.39 | 0.154 | -0.53* | 0.042 |
| **MSAVI2** | 0.48 | 0.073 | 0.03 | 0.909 | -0.06 | 0.844 | -0.36 | 0.188 |
| **MSR** | 0.52* | 0.048 | 0.04 | 0.882 | -0.05 | 0.871 | -0.33 | 0.233 |
| **OSAVI** | 0.48 | 0.070 | 0.03 | 0.904 | -0.05 | 0.848 | -0.35 | 0.201 |
| **RDVI** | 0.43 | 0.111 | -0.02 | 0.944 | -0.03 | 0.919 | -0.31 | 0.254 |
| **SAVI** | 0.48 | 0.070 | 0.03 | 0.904 | -0.05 | 0.848 | -0.35 | 0.201 |
| **TVI** | 0.48 | 0.071 | 0.03 | 0.906 | -0.05 | 0.846 | -0.35 | 0.196 |
| **RSI(B,G)** | -0.39 | 0.149 | -0.58* | 0.024 | -0.38 | 0.159 | 0.06 | 0.822 |
| **RSI(B,R)** | -0.37 | 0.172 | -0.38 | 0.164 | -0.40 | 0.144 | -0.22 | 0.424 |
| **RSI(B,NIR)** | -0.42 | 0.120 | -0.19 | 0.495 | -0.44 | 0.098 | 0.20 | 0.485 |
| **RSI(G,B)** | 0.56* | 0.031 | 0.61* | 0.017 | 0.53* | 0.043 | -0.09 | 0.752 |
| **RSI(G,R)** | 0.50 | 0.058 | 0.38 | 0.161 | -0.46 | 0.087 | -0.54* | 0.036 |
| **RSI(G,NIR)** | -0.39 | 0.153 | 0.06 | 0.820 | -0.11 | 0.685 | 0.20 | 0.466 |
| **RSI(R,B)** | 0.36 | 0.182 | 0.45 | 0.096 | 0.56* | 0.031 | 0.25 | 0.377 |
| **RSI(R,G)** | -0.45 | 0.090 | -0.38 | 0.160 | 0.46 | 0.086 | 0.56* | 0.031 |
| **RSI(R,NIR)** | -0.48 | 0.073 | -0.03 | 0.909 | 0.06 | 0.844 | 0.36 | 0.188 |
| **RSI(NIR,B)** | 0.66** | 0.008 | 0.24 | 0.393 | 0.52* | 0.047 | -0.19 | 0.486 |
| **RSI(NIR,G)** | 0.41 | 0.131 | -0.05 | 0.851 | 0.13 | 0.636 | -0.19 | 0.492 |
| **RSI(NIR,R)** | 0.53* | 0.041 | 0.04 | 0.873 | -0.04 | 0.882 | -0.32 | 0.250 |
| **NDSI(B,G)** | -0.40 | 0.140 | -0.59* | 0.022 | -0.40 | 0.138 | 0.07 | 0.803 |
| **NDSI(B,R)** | -0.38 | 0.166 | -0.40 | 0.145 | -0.42 | 0.124 | -0.23 | 0.412 |
| **NDSI(B,NIR)** | -0.42 | 0.119 | -0.19 | 0.488 | -0.45 | 0.096 | 0.20 | 0.484 |
| **NDSI(G,B)** | 0.40 | 0.140 | 0.59* | 0.022 | 0.40 | 0.138 | -0.07 | 0.803 |
| **NDSI(G,R)** | 0.48 | 0.073 | 0.38 | 0.161 | -0.46 | 0.086 | -0.55* | 0.034 |
| **NDSI(G,NIR)** | -0.39 | 0.151 | 0.06 | 0.824 | -0.12 | 0.679 | 0.20 | 0.470 |
| **NDSI(R,B)** | 0.38 | 0.166 | 0.40 | 0.145 | 0.42 | 0.124 | 0.23 | 0.412 |
| **NDSI(R,G)** | -0.48 | 0.073 | -0.38 | 0.161 | 0.46 | 0.086 | 0.55* | 0.034 |
| **NDSI(R,NIR)** | -0.48 | 0.070 | -0.03 | 0.904 | 0.05 | 0.848 | 0.35 | 0.201 |
| **NDSI(NIR,B)** | 0.42 | 0.119 | 0.19 | 0.488 | 0.45 | 0.096 | -0.20 | 0.484 |
| **NDSI(NIR,G)** | 0.39 | 0.151 | -0.06 | 0.824 | 0.12 | 0.679 | -0.20 | 0.470 |
| **NDSI(NIR,R)** | 0.48 | 0.070 | 0.03 | 0.904 | -0.05 | 0.848 | -0.35 | 0.201 |

green: healthy (avg. DIISHR <1%); orange: moderately diseased (avg. DIISHR 15-29.9%); red: severely diseased (avg. DIISHR 30-44.9%); and grey: fully damaged (avg. DIISHR ≥45%).

S8b. SkySat – Trial 2 – Pearson correlation analysis between severity and spectral features at each DAI (untreated block) (*P* = p-value; **P* < 0.05; ***P* < 0.01).

| **Spectral feature** | **SKYSAT** | | | | | | | |
| --- | --- | --- | --- | --- | --- | --- | --- | --- |
| **DAI 17** | | **DAI 30** | | **DAI 37** | | **DAI 44** | |
| **Healthy** | | **Mildly Diseased** | | **Moderately Diseased** | | **Severely Diseased** | |
| **r** | ***P*** | **r** | ***P*** | **r** | ***P*** | **r** | ***P*** |
| **B** | -0.09 | 0.738 | -0.35 | 0.199 | -0.6* | 0.017 | -0.06 | 0.838 |
| **G** | 0.17 | 0.541 | -0.22 | 0.433 | -0.18 | 0.526 | 0.20 | 0.475 |
| **R** | -0.17 | 0.553 | -0.11 | 0.696 | -0.02 | 0.936 | 0.33 | 0.235 |
| **NIR** | 0.02 | 0.932 | 0.03 | 0.910 | -0.19 | 0.508 | -0.32 | 0.240 |
| **CIG** | -0.07 | 0.810 | 0.13 | 0.641 | -0.06 | 0.843 | -0.32 | 0.243 |
| **CVI** | -0.31 | 0.255 | 0.22 | 0.427 | 0.04 | 0.889 | -0.27 | 0.328 |
| **GLI** | 0.31 | 0.261 | 0.13 | 0.657 | 0.14 | 0.615 | -0.26 | 0.352 |
| **MSAVI2** | 0.13 | 0.633 | 0.09 | 0.741 | -0.10 | 0.728 | -0.36 | 0.189 |
| **MSR** | 0.09 | 0.751 | 0.07 | 0.796 | -0.11 | 0.699 | -0.34 | 0.211 |
| **OSAVI** | 0.13 | 0.649 | 0.09 | 0.751 | -0.10 | 0.722 | -0.36 | 0.194 |
| **RDVI** | 0.06 | 0.818 | 0.06 | 0.832 | -0.15 | 0.592 | -0.34 | 0.212 |
| **SAVI** | 0.13 | 0.649 | 0.09 | 0.751 | -0.10 | 0.722 | -0.36 | 0.194 |
| **TVI** | 0.13 | 0.643 | 0.09 | 0.748 | -0.10 | 0.724 | -0.36 | 0.192 |
| **RSI(B,G)** | -0.08 | 0.775 | -0.36 | 0.185 | -0.68** | 0.005 | -0.15 | 0.596 |
| **RSI(B,R)** | -0.04 | 0.898 | -0.38 | 0.164 | -0.64* | 0.011 | -0.27 | 0.324 |
| **RSI(B,NIR)** | -0.11 | 0.689 | -0.26 | 0.353 | -0.49 | 0.066 | 0.24 | 0.383 |
| **RSI(G,B)** | 0.09 | 0.759 | 0.35 | 0.206 | 0.69** | 0.005 | 0.11 | 0.708 |
| **RSI(G,R)** | 0.32 | 0.239 | -0.08 | 0.783 | -0.17 | 0.535 | -0.32 | 0.247 |
| **RSI(G,NIR)** | 0.05 | 0.873 | -0.13 | 0.645 | 0.06 | 0.834 | 0.34 | 0.209 |
| **RSI(R,B)** | -0.05 | 0.872 | 0.42 | 0.121 | 0.68** | 0.006 | 0.24 | 0.379 |
| **RSI(R,G)** | -0.33 | 0.236 | 0.06 | 0.829 | 0.17 | 0.538 | 0.33 | 0.233 |
| **RSI(R,NIR)** | -0.13 | 0.633 | -0.09 | 0.741 | 0.10 | 0.728 | 0.36 | 0.189 |
| **RSI(NIR,B)** | 0.01 | 0.977 | 0.27 | 0.330 | 0.53* | 0.042 | -0.27 | 0.333 |
| **RSI(NIR,G)** | -0.07 | 0.810 | 0.13 | 0.641 | -0.06 | 0.843 | -0.32 | 0.243 |
| **RSI(NIR,R)** | 0.08 | 0.787 | 0.07 | 0.814 | -0.11 | 0.693 | -0.34 | 0.219 |
| **NDSI(B,G)** | -0.08 | 0.773 | -0.36 | 0.191 | -0.68** | 0.005 | -0.14 | 0.621 |
| **NDSI(B,R)** | -0.04 | 0.892 | -0.39 | 0.152 | -0.64** | 0.010 | -0.27 | 0.335 |
| **NDSI(B,NIR)** | -0.11 | 0.691 | -0.26 | 0.351 | -0.49 | 0.066 | 0.25 | 0.379 |
| **NDSI(G,B)** | 0.08 | 0.773 | 0.36 | 0.191 | 0.68** | 0.005 | 0.14 | 0.621 |
| **NDSI(G,R)** | 0.33 | 0.237 | -0.07 | 0.804 | -0.17 | 0.537 | -0.32 | 0.241 |
| **NDSI(G,NIR)** | 0.05 | 0.866 | -0.13 | 0.645 | 0.06 | 0.834 | 0.34 | 0.214 |
| **NDSI(R,B)** | 0.04 | 0.892 | 0.39 | 0.152 | 0.64** | 0.010 | 0.27 | 0.335 |
| **NDSI(R,G)** | -0.33 | 0.237 | 0.07 | 0.804 | 0.17 | 0.537 | 0.32 | 0.241 |
| **NDSI(R,NIR)** | -0.13 | 0.649 | -0.09 | 0.751 | 0.10 | 0.722 | 0.36 | 0.194 |
| **NDSI(NIR,B)** | 0.11 | 0.691 | 0.26 | 0.351 | 0.49 | 0.066 | -0.25 | 0.379 |
| **NDSI(NIR,G)** | -0.05 | 0.866 | 0.13 | 0.645 | -0.06 | 0.834 | -0.34 | 0.214 |
| **NDSI(NIR,R)** | 0.13 | 0.649 | 0.09 | 0.751 | -0.10 | 0.722 | -0.36 | 0.194 |

green: healthy (avg. DIISHR <1%); yellow: mildly diseased (avg. DIISHR 1-14.9%); orange: moderately diseased (avg. DIISHR 15-29.9%); and red: severely diseased (avg. DIISHR 30-44.9%).

S9a. SkySat – Trial 1 – Pearson correlation analysis between DIIS and spectral features at each DAI (untreated block) (*P* = p-value; **P* < 0.05; ***P* < 0.01).

| **Spectral feature** | **SKYSAT** | | | | | | | |
| --- | --- | --- | --- | --- | --- | --- | --- | --- |
| **DAI 17** | | **DAI 30** | | **DAI 37** | | **DAI 44** | |
| **Healthy** | | **Moderately Diseased** | | **Severely Diseased** | | **Fully Diseased** | |
| **r** | ***P*** | **r** | ***P*** | **r** | ***P*** | **r** | ***P*** |
| **B** | -0.33 | 0.236 | -0.46 | 0.084 | -0.45 | 0.090 | -0.03 | 0.914 |
| **G** | -0.29 | 0.302 | -0.05 | 0.856 | -0.41 | 0.134 | -0.19 | 0.489 |
| **R** | -0.47 | 0.076 | -0.24 | 0.393 | -0.03 | 0.926 | 0.38 | 0.163 |
| **NIR** | 0.36 | 0.189 | -0.02 | 0.943 | 0.05 | 0.865 | -0.26 | 0.352 |
| **CIG** | 0.41 | 0.134 | 0.01 | 0.963 | 0.25 | 0.365 | -0.19 | 0.492 |
| **CVI** | 0.25 | 0.363 | -0.10 | 0.724 | 0.53* | 0.042 | 0.13 | 0.647 |
| **GLI** | 0.38 | 0.158 | 0.59* | 0.022 | -0.41 | 0.126 | -0.53* | 0.042 |
| **MSAVI2** | 0.43 | 0.111 | 0.09 | 0.752 | 0.03 | 0.921 | -0.36 | 0.188 |
| **MSR** | 0.48 | 0.071 | 0.10 | 0.720 | 0.04 | 0.881 | -0.33 | 0.233 |
| **OSAVI** | 0.43 | 0.107 | 0.09 | 0.747 | 0.03 | 0.915 | -0.35 | 0.201 |
| **RDVI** | 0.39 | 0.148 | 0.03 | 0.923 | 0.04 | 0.890 | -0.31 | 0.254 |
| **SAVI** | 0.43 | 0.107 | 0.09 | 0.747 | 0.03 | 0.915 | -0.35 | 0.201 |
| **TVI** | 0.43 | 0.108 | 0.09 | 0.749 | 0.03 | 0.917 | -0.35 | 0.196 |
| **RSI(B,G)** | -0.32 | 0.248 | -0.59* | 0.021 | -0.40 | 0.145 | 0.06 | 0.822 |
| **RSI(B,R)** | -0.31 | 0.263 | -0.40 | 0.143 | -0.41 | 0.128 | -0.22 | 0.424 |
| **RSI(B,NIR)** | -0.35 | 0.196 | -0.25 | 0.364 | -0.54* | 0.039 | 0.20 | 0.485 |
| **RSI(G,B)** | 0.41 | 0.127 | 0.64* | 0.011 | 0.53* | 0.043 | -0.09 | 0.752 |
| **RSI(G,R)** | 0.39 | 0.150 | 0.38 | 0.158 | -0.48 | 0.071 | -0.54* | 0.036 |
| **RSI(G,NIR)** | -0.38 | 0.157 | 0.00 | 0.996 | -0.24 | 0.397 | 0.20 | 0.466 |
| **RSI(R,B)** | 0.26 | 0.341 | 0.47 | 0.079 | 0.56* | 0.029 | 0.25 | 0.377 |
| **RSI(R,G)** | -0.33 | 0.227 | -0.38 | 0.163 | 0.48 | 0.067 | 0.56* | 0.031 |
| **RSI(R,NIR)** | -0.43 | 0.111 | -0.09 | 0.752 | -0.03 | 0.921 | 0.36 | 0.188 |
| **RSI(NIR,B)** | 0.56* | 0.029 | 0.30 | 0.269 | 0.56* | 0.032 | -0.19 | 0.486 |
| **RSI(NIR,G)** | 0.41 | 0.134 | 0.01 | 0.963 | 0.25 | 0.365 | -0.19 | 0.492 |
| **RSI(NIR,R)** | 0.50 | 0.059 | 0.11 | 0.709 | 0.05 | 0.868 | -0.32 | 0.250 |
| **NDSI(B,G)** | -0.32 | 0.239 | -0.6* | 0.018 | -0.41 | 0.125 | 0.07 | 0.803 |
| **NDSI(B,R)** | -0.31 | 0.258 | -0.41 | 0.125 | -0.43 | 0.109 | -0.23 | 0.412 |
| **NDSI(B,NIR)** | -0.35 | 0.195 | -0.26 | 0.358 | -0.54* | 0.039 | 0.20 | 0.484 |
| **NDSI(G,B)** | 0.32 | 0.239 | 0.6* | 0.018 | 0.41 | 0.125 | -0.07 | 0.803 |
| **NDSI(G,R)** | 0.36 | 0.186 | 0.38 | 0.160 | -0.48 | 0.069 | -0.55* | 0.034 |
| **NDSI(G,NIR)** | -0.39 | 0.155 | 0.00 | 0.999 | -0.24 | 0.393 | 0.20 | 0.470 |
| **NDSI(R,B)** | 0.31 | 0.258 | 0.41 | 0.125 | 0.43 | 0.109 | 0.23 | 0.412 |
| **NDSI(R,G)** | -0.36 | 0.186 | -0.38 | 0.160 | 0.48 | 0.069 | 0.55* | 0.034 |
| **NDSI(R,NIR)** | -0.43 | 0.107 | -0.09 | 0.747 | -0.03 | 0.915 | 0.35 | 0.201 |
| **NDSI(NIR,B)** | 0.35 | 0.195 | 0.26 | 0.358 | 0.54* | 0.039 | -0.20 | 0.484 |
| **NDSI(NIR,G)** | 0.39 | 0.155 | 0.00 | 0.999 | 0.24 | 0.393 | -0.20 | 0.470 |
| **NDSI(NIR,R)** | 0.43 | 0.107 | 0.09 | 0.747 | 0.03 | 0.915 | -0.35 | 0.201 |

green: healthy (avg. DIISHR <1%); orange: moderately diseased (avg. DIISHR 15-29.9%); red: severely diseased (avg. DIISHR 30-44.9%); and grey: fully damaged (avg. DIISHR ≥45%).

S9b. SkySat – Trial 2 – Pearson correlation analysis between DIIS and spectral features at each DAI (untreated block) (*P* = p-value; **P* < 0.05; ***P* < 0.01).

| **Spectral feature** | **SKYSAT** | | | | | | | |
| --- | --- | --- | --- | --- | --- | --- | --- | --- |
| **DAI 17** | | **DAI 30** | | **DAI 37** | | **DAI 44** | |
| **Healthy** | | **Mildly Diseased** | | **Moderately Diseased** | | **Severely Diseased** | |
| **r** | ***P*** | **r** | ***P*** | **r** | ***P*** | **r** | ***P*** |
| **B** | -0.05 | 0.855 | -0.48 | 0.070 | -0.58* | 0.024 | -0.06 | 0.838 |
| **G** | 0.33 | 0.228 | -0.29 | 0.300 | -0.09 | 0.736 | 0.20 | 0.475 |
| **R** | -0.06 | 0.824 | -0.16 | 0.575 | 0.10 | 0.718 | 0.33 | 0.235 |
| **NIR** | -0.08 | 0.783 | 0.11 | 0.697 | -0.26 | 0.348 | -0.32 | 0.240 |
| **CIG** | -0.22 | 0.421 | 0.21 | 0.447 | -0.15 | 0.603 | -0.32 | 0.243 |
| **CVI** | -0.47 | 0.076 | 0.32 | 0.246 | -0.01 | 0.963 | -0.27 | 0.328 |
| **GLI** | 0.28 | 0.317 | 0.21 | 0.460 | 0.04 | 0.879 | -0.26 | 0.352 |
| **MSAVI2** | 0.03 | 0.929 | 0.16 | 0.574 | -0.20 | 0.478 | -0.36 | 0.189 |
| **MSR** | -0.03 | 0.905 | 0.14 | 0.615 | -0.21 | 0.446 | -0.34 | 0.211 |
| **OSAVI** | 0.02 | 0.951 | 0.16 | 0.581 | -0.20 | 0.472 | -0.36 | 0.194 |
| **RDVI** | -0.04 | 0.877 | 0.13 | 0.637 | -0.24 | 0.392 | -0.34 | 0.212 |
| **SAVI** | 0.02 | 0.951 | 0.16 | 0.581 | -0.20 | 0.472 | -0.36 | 0.194 |
| **TVI** | 0.02 | 0.943 | 0.16 | 0.579 | -0.20 | 0.474 | -0.36 | 0.192 |
| **RSI(B,G)** | -0.04 | 0.881 | -0.50 | 0.058 | -0.68** | 0.005 | -0.15 | 0.596 |
| **RSI(B,R)** | 0.01 | 0.975 | -0.51 | 0.054 | -0.66** | 0.007 | -0.27 | 0.324 |
| **RSI(B,NIR)** | -0.07 | 0.816 | -0.38 | 0.161 | -0.43 | 0.106 | 0.24 | 0.383 |
| **RSI(G,B)** | 0.03 | 0.919 | 0.49 | 0.063 | 0.7** | 0.003 | 0.11 | 0.708 |
| **RSI(G,R)** | 0.30 | 0.285 | -0.06 | 0.830 | -0.27 | 0.328 | -0.32 | 0.247 |
| **RSI(G,NIR)** | 0.20 | 0.477 | -0.21 | 0.448 | 0.15 | 0.600 | 0.34 | 0.209 |
| **RSI(R,B)** | -0.09 | 0.737 | 0.56* | 0.030 | 0.71** | 0.003 | 0.24 | 0.379 |
| **RSI(R,G)** | -0.29 | 0.286 | 0.05 | 0.866 | 0.27 | 0.336 | 0.33 | 0.233 |
| **RSI(R,NIR)** | -0.03 | 0.929 | -0.16 | 0.574 | 0.20 | 0.478 | 0.36 | 0.189 |
| **RSI(NIR,B)** | -0.11 | 0.705 | 0.40 | 0.137 | 0.51* | 0.050 | -0.27 | 0.333 |
| **RSI(NIR,G)** | -0.22 | 0.421 | 0.21 | 0.447 | -0.15 | 0.603 | -0.32 | 0.243 |
| **RSI(NIR,R)** | -0.05 | 0.855 | 0.14 | 0.630 | -0.22 | 0.438 | -0.34 | 0.219 |
| **NDSI(B,G)** | -0.04 | 0.888 | -0.50 | 0.059 | -0.68** | 0.005 | -0.14 | 0.621 |
| **NDSI(B,R)** | 0.01 | 0.972 | -0.52* | 0.047 | -0.67** | 0.006 | -0.27 | 0.335 |
| **NDSI(B,NIR)** | -0.06 | 0.819 | -0.38 | 0.159 | -0.43 | 0.105 | 0.25 | 0.379 |
| **NDSI(G,B)** | 0.04 | 0.888 | 0.50 | 0.059 | 0.68** | 0.005 | 0.14 | 0.621 |
| **NDSI(G,R)** | 0.30 | 0.285 | -0.05 | 0.847 | -0.27 | 0.332 | -0.32 | 0.241 |
| **NDSI(G,NIR)** | 0.20 | 0.471 | -0.21 | 0.448 | 0.15 | 0.600 | 0.34 | 0.214 |
| **NDSI(R,B)** | -0.01 | 0.972 | 0.52* | 0.047 | 0.67** | 0.006 | 0.27 | 0.335 |
| **NDSI(R,G)** | -0.30 | 0.285 | 0.05 | 0.847 | 0.27 | 0.332 | 0.32 | 0.241 |
| **NDSI(R,NIR)** | -0.02 | 0.951 | -0.16 | 0.581 | 0.20 | 0.472 | 0.36 | 0.194 |
| **NDSI(NIR,B)** | 0.06 | 0.819 | 0.38 | 0.159 | 0.43 | 0.105 | -0.25 | 0.379 |
| **NDSI(NIR,G)** | -0.20 | 0.471 | 0.21 | 0.448 | -0.15 | 0.600 | -0.34 | 0.214 |
| **NDSI(NIR,R)** | 0.02 | 0.951 | 0.16 | 0.581 | -0.20 | 0.472 | -0.36 | 0.194 |

green: healthy (avg. DIISHR <1%); yellow: mildly diseased (avg. DIISHR 1-14.9%); orange: moderately diseased (avg. DIISHR 15-29.9%); and red: severely diseased (avg. DIISHR 30-44.9%).

S10. Pleiades-Neo – Pearson correlation analysis between DIISHR and spectral features at each DAI (untreated block) for Trials 1 and 2 (*P* = p-value; **P* < 0.05; ***P* < 0.01).

| **Spectral feature** | **TRIAL 1** | | | | **TRIAL 2** | | | |
| --- | --- | --- | --- | --- | --- | --- | --- | --- |
| **DAI 37** | | **DAI 44** | | **DAI 37** | | **DAI 44** | |
| **Severely Diseased** | | **Fully Diseased** | | **Moderately Diseased** | | **Severely Diseased** | |
| **r** | ***P*** | **r** | ***P*** | **r** | ***P*** | **r** | ***P*** |
| **DB** | -0.64* | 0.011 | -0.33 | 0.234 | -0.22 | 0.425 | -0.78*** | 0.001 |
| **B** | -0.52* | 0.045 | -0.19 | 0.492 | -0.36 | 0.181 | -0.55* | 0.033 |
| **G** | -0.26 | 0.345 | -0.29 | 0.296 | 0.06 | 0.829 | -0.24 | 0.384 |
| **R** | -0.30 | 0.275 | 0.51 | 0.050 | 0.12 | 0.661 | 0.06 | 0.843 |
| **RE** | 0.25 | 0.372 | -0.37 | 0.172 | 0.09 | 0.759 | -0.31 | 0.266 |
| **NIR** | 0.28 | 0.309 | -0.32 | 0.238 | -0.14 | 0.622 | -0.30 | 0.270 |
| **CIG** | 0.31 | 0.257 | -0.28 | 0.305 | -0.12 | 0.672 | -0.19 | 0.487 |
| **CVI** | 0.30 | 0.278 | 0.00 | 0.991 | -0.08 | 0.772 | -0.13 | 0.640 |
| **GLI** | 0.57* | 0.027 | -0.56* | 0.031 | 0.22 | 0.422 | -0.12 | 0.664 |
| **MSAVI2** | 0.29 | 0.293 | -0.46 | 0.088 | -0.14 | 0.606 | -0.24 | 0.379 |
| **MSR** | 0.31 | 0.264 | -0.41 | 0.126 | -0.14 | 0.629 | -0.22 | 0.422 |
| **OSAVI** | 0.29 | 0.287 | -0.44 | 0.100 | -0.14 | 0.616 | -0.24 | 0.391 |
| **PSRI** | -0.23 | 0.416 | 0.63* | 0.013 | 0.23 | 0.400 | 0.29 | 0.299 |
| **RDVI** | 0.29 | 0.289 | -0.40 | 0.141 | -0.14 | 0.617 | -0.27 | 0.339 |
| **SAVI** | 0.29 | 0.287 | -0.44 | 0.100 | -0.14 | 0.616 | -0.24 | 0.391 |
| **TVI** | 0.29 | 0.289 | -0.45 | 0.095 | -0.14 | 0.613 | -0.24 | 0.387 |
| **RSI(DB,B)** | -0.01 | 0.960 | -0.30 | 0.286 | 0.44 | 0.099 | -0.06 | 0.827 |
| **RSI(DB,G)** | -0.21 | 0.450 | -0.11 | 0.698 | -0.29 | 0.287 | -0.33 | 0.225 |
| **RSI(DB,R)** | 0.03 | 0.927 | -0.72** | 0.002 | -0.24 | 0.381 | -0.34 | 0.216 |
| **RSI(DB,RE)** | -0.62* | 0.013 | 0.24 | 0.394 | -0.20 | 0.482 | -0.08 | 0.768 |
| **RSI(DB,NIR)** | -0.46 | 0.085 | 0.25 | 0.362 | 0.05 | 0.866 | 0.12 | 0.661 |
| **RSI(B,DB)** | 0.01 | 0.967 | 0.30 | 0.276 | -0.44 | 0.104 | 0.08 | 0.767 |
| **RSI(B,G)** | -0.30 | 0.278 | 0.17 | 0.546 | -0.64** | 0.010 | -0.43 | 0.107 |
| **RSI(B,R)** | 0.04 | 0.892 | -0.67** | 0.006 | -0.44 | 0.103 | -0.42 | 0.123 |
| **RSI(B,RE)** | -0.6* | 0.019 | 0.32 | 0.245 | -0.31 | 0.255 | -0.05 | 0.871 |
| **RSI(B,NIR)** | -0.42 | 0.116 | 0.31 | 0.267 | -0.05 | 0.868 | 0.13 | 0.656 |
| **RSI(G,DB)** | 0.23 | 0.414 | 0.11 | 0.691 | 0.30 | 0.279 | 0.36 | 0.192 |
| **RSI(G,B)** | 0.31 | 0.260 | -0.18 | 0.531 | 0.66** | 0.008 | 0.45 | 0.091 |
| **RSI(G,R)** | 0.27 | 0.325 | -0.61* | 0.016 | -0.17 | 0.538 | -0.27 | 0.326 |
| **RSI(G,RE)** | -0.36 | 0.183 | 0.35 | 0.204 | 0.01 | 0.959 | 0.12 | 0.658 |
| **RSI(G,NIR)** | -0.29 | 0.291 | 0.32 | 0.247 | 0.12 | 0.662 | 0.21 | 0.450 |
| **RSI(R,DB)** | -0.01 | 0.980 | 0.74** | 0.002 | 0.25 | 0.360 | 0.37 | 0.177 |
| **RSI(R,B)** | -0.01 | 0.971 | 0.69** | 0.004 | 0.45 | 0.090 | 0.44 | 0.103 |
| **RSI(R,G)** | -0.28 | 0.319 | 0.62* | 0.013 | 0.18 | 0.528 | 0.28 | 0.315 |
| **RSI(R,RE)** | -0.34 | 0.214 | 0.51 | 0.051 | 0.09 | 0.754 | 0.21 | 0.460 |
| **RSI(R,NIR)** | -0.29 | 0.293 | 0.46 | 0.088 | 0.14 | 0.606 | 0.24 | 0.379 |
| **RSI(RE,DB)** | 0.64** | 0.010 | -0.23 | 0.407 | 0.23 | 0.416 | 0.10 | 0.736 |
| **RSI(RE,B)** | 0.61* | 0.016 | -0.30 | 0.274 | 0.34 | 0.214 | 0.05 | 0.863 |
| **RSI(RE,G)** | 0.38 | 0.167 | -0.33 | 0.234 | -0.01 | 0.982 | -0.12 | 0.666 |
| **RSI(RE,R)** | 0.35 | 0.199 | -0.47 | 0.076 | -0.08 | 0.785 | -0.19 | 0.487 |
| **RSI(RE,NIR)** | -0.22 | 0.424 | 0.25 | 0.360 | 0.24 | 0.398 | 0.28 | 0.316 |
| **RSI(NIR,DB)** | 0.49 | 0.066 | -0.23 | 0.401 | -0.04 | 0.898 | -0.12 | 0.674 |
| **RSI(NIR,B)** | 0.44 | 0.100 | -0.27 | 0.323 | 0.06 | 0.824 | -0.12 | 0.678 |
| **RSI(NIR,G)** | 0.31 | 0.257 | -0.28 | 0.305 | -0.12 | 0.672 | -0.19 | 0.487 |
| **RSI(NIR,R)** | 0.31 | 0.256 | -0.40 | 0.142 | -0.14 | 0.630 | -0.22 | 0.437 |
| **RSI(NIR,RE)** | 0.23 | 0.403 | -0.24 | 0.386 | -0.23 | 0.405 | -0.26 | 0.343 |
| **NDSI(DB,B)** | -0.01 | 0.964 | -0.30 | 0.281 | 0.44 | 0.101 | -0.07 | 0.797 |
| **NDSI(DB,G)** | -0.22 | 0.435 | -0.11 | 0.695 | -0.30 | 0.283 | -0.34 | 0.211 |
| **NDSI(DB,R)** | 0.02 | 0.952 | -0.73** | 0.002 | -0.25 | 0.371 | -0.35 | 0.199 |
| **NDSI(DB,RE)** | -0.63* | 0.012 | 0.24 | 0.397 | -0.20 | 0.466 | -0.09 | 0.760 |
| **NDSI(DB,NIR)** | -0.46 | 0.083 | 0.25 | 0.369 | 0.05 | 0.873 | 0.12 | 0.663 |
| **NDSI(B,DB)** | 0.01 | 0.964 | 0.30 | 0.281 | -0.44 | 0.101 | 0.07 | 0.797 |
| **NDSI(B,G)** | -0.30 | 0.270 | 0.17 | 0.539 | -0.65** | 0.009 | -0.44 | 0.100 |
| **NDSI(B,R)** | 0.03 | 0.929 | -0.68** | 0.005 | -0.44 | 0.097 | -0.43 | 0.114 |
| **NDSI(B,RE)** | -0.6* | 0.018 | 0.32 | 0.252 | -0.32 | 0.245 | -0.05 | 0.868 |
| **NDSI(B,NIR)** | -0.43 | 0.114 | 0.30 | 0.277 | -0.05 | 0.859 | 0.12 | 0.660 |
| **NDSI(G,DB)** | 0.22 | 0.435 | 0.11 | 0.695 | 0.30 | 0.283 | 0.34 | 0.211 |
| **NDSI(G,B)** | 0.30 | 0.270 | -0.17 | 0.539 | 0.65** | 0.009 | 0.44 | 0.100 |
| **NDSI(G,R)** | 0.27 | 0.322 | -0.62* | 0.014 | -0.17 | 0.535 | -0.28 | 0.321 |
| **NDSI(G,RE)** | -0.37 | 0.178 | 0.34 | 0.214 | 0.01 | 0.967 | 0.12 | 0.661 |
| **NDSI(G,NIR)** | -0.30 | 0.285 | 0.31 | 0.261 | 0.12 | 0.666 | 0.21 | 0.458 |
| **NDSI(R,DB)** | -0.02 | 0.952 | 0.73** | 0.002 | 0.25 | 0.371 | 0.35 | 0.199 |
| **NDSI(R,B)** | -0.03 | 0.929 | 0.68** | 0.005 | 0.44 | 0.097 | 0.43 | 0.114 |
| **NDSI(R,G)** | -0.27 | 0.322 | 0.62* | 0.014 | 0.17 | 0.535 | 0.28 | 0.321 |
| **NDSI(R,RE)** | -0.34 | 0.210 | 0.50 | 0.058 | 0.08 | 0.768 | 0.20 | 0.468 |
| **NDSI(R,NIR)** | -0.29 | 0.287 | 0.44 | 0.100 | 0.14 | 0.616 | 0.24 | 0.391 |
| **NDSI(RE,DB)** | 0.63* | 0.012 | -0.24 | 0.397 | 0.20 | 0.466 | 0.09 | 0.760 |
| **NDSI(RE,B)** | 0.6* | 0.018 | -0.32 | 0.252 | 0.32 | 0.245 | 0.05 | 0.868 |
| **NDSI(RE,G)** | 0.37 | 0.178 | -0.34 | 0.214 | -0.01 | 0.967 | -0.12 | 0.661 |
| **NDSI(RE,R)** | 0.34 | 0.210 | -0.50 | 0.058 | -0.08 | 0.768 | -0.20 | 0.468 |
| **NDSI(RE,NIR)** | -0.23 | 0.416 | 0.25 | 0.371 | 0.23 | 0.400 | 0.27 | 0.326 |
| **NDSI(NIR,DB)** | 0.46 | 0.083 | -0.25 | 0.369 | -0.05 | 0.873 | -0.12 | 0.663 |
| **NDSI(NIR,B)** | 0.43 | 0.114 | -0.30 | 0.277 | 0.05 | 0.859 | -0.12 | 0.660 |
| **NDSI(NIR,G)** | 0.30 | 0.285 | -0.31 | 0.261 | -0.12 | 0.666 | -0.21 | 0.458 |
| **NDSI(NIR,R)** | 0.29 | 0.287 | -0.44 | 0.100 | -0.14 | 0.616 | -0.24 | 0.391 |
| **NDSI(NIR,RE)** | 0.23 | 0.416 | -0.25 | 0.371 | -0.23 | 0.400 | -0.27 | 0.326 |

orange: moderately diseased (avg. DIISHR 15-29.9%); red: severely diseased (avg. DIISHR 30-44.9%); and grey: fully damaged (avg. DIISHR ≥45%).

S11. Pleiades-Neo – Pearson correlation analysis between severity and spectral features at each DAI (untreated block) for Trials 1 and 2 (*P* = p-value; **P* < 0.05; ***P* < 0.01).

| **Spectral feature** | **TRIAL 1** | | | | **TRIAL 2** | | | |
| --- | --- | --- | --- | --- | --- | --- | --- | --- |
| **DAI 37** | | **DAI 44** | | **DAI 37** | | **DAI 44** | |
| **Severely Diseased** | | **Fully Diseased** | | **Moderately Diseased** | | **Severely Diseased** | |
| **r** | ***P*** | **r** | ***P*** | **r** | ***P*** | **r** | ***P*** |
| **DB** | -0.50 | 0.056 | -0.30 | 0.273 | -0.26 | 0.340 | -0.77*** | 0.001 |
| **B** | -0.31 | 0.261 | -0.17 | 0.556 | -0.42 | 0.116 | -0.54* | 0.038 |
| **G** | 0.02 | 0.945 | -0.29 | 0.292 | -0.05 | 0.866 | -0.25 | 0.366 |
| **R** | -0.05 | 0.847 | 0.56* | 0.029 | 0.04 | 0.881 | 0.07 | 0.813 |
| **RE** | 0.31 | 0.262 | -0.40 | 0.134 | 0.03 | 0.923 | -0.38 | 0.161 |
| **NIR** | 0.16 | 0.575 | -0.36 | 0.186 | -0.11 | 0.695 | -0.38 | 0.165 |
| **CIG** | 0.11 | 0.701 | -0.33 | 0.237 | -0.05 | 0.850 | -0.26 | 0.352 |
| **CVI** | 0.08 | 0.782 | -0.03 | 0.927 | -0.01 | 0.961 | -0.21 | 0.445 |
| **GLI** | 0.55* | 0.033 | -0.6* | 0.018 | 0.22 | 0.421 | -0.16 | 0.578 |
| **MSAVI2** | 0.10 | 0.725 | -0.50 | 0.057 | -0.10 | 0.734 | -0.31 | 0.264 |
| **MSR** | 0.12 | 0.678 | -0.46 | 0.086 | -0.08 | 0.788 | -0.28 | 0.312 |
| **OSAVI** | 0.10 | 0.716 | -0.49 | 0.066 | -0.09 | 0.747 | -0.30 | 0.278 |
| **PSRI** | -0.12 | 0.670 | 0.67** | 0.006 | 0.20 | 0.484 | 0.31 | 0.256 |
| **RDVI** | 0.13 | 0.637 | -0.44 | 0.100 | -0.10 | 0.721 | -0.33 | 0.228 |
| **SAVI** | 0.10 | 0.716 | -0.49 | 0.066 | -0.09 | 0.747 | -0.30 | 0.278 |
| **TVI** | 0.10 | 0.719 | -0.49 | 0.063 | -0.09 | 0.743 | -0.30 | 0.273 |
| **RSI(DB,B)** | -0.23 | 0.404 | -0.29 | 0.299 | 0.50 | 0.056 | -0.06 | 0.823 |
| **RSI(DB,G)** | -0.44 | 0.097 | -0.07 | 0.796 | -0.19 | 0.503 | -0.31 | 0.257 |
| **RSI(DB,R)** | -0.18 | 0.516 | -0.75** | 0.001 | -0.16 | 0.561 | -0.35 | 0.206 |
| **RSI(DB,RE)** | -0.59* | 0.022 | 0.28 | 0.305 | -0.19 | 0.508 | 0.01 | 0.977 |
| **RSI(DB,NIR)** | -0.30 | 0.271 | 0.30 | 0.278 | 0.02 | 0.945 | 0.21 | 0.444 |
| **RSI(B,DB)** | 0.23 | 0.407 | 0.29 | 0.287 | -0.49 | 0.061 | 0.09 | 0.761 |
| **RSI(B,G)** | -0.48 | 0.068 | 0.21 | 0.460 | -0.57* | 0.027 | -0.40 | 0.141 |
| **RSI(B,R)** | -0.13 | 0.633 | -0.71** | 0.003 | -0.37 | 0.179 | -0.42 | 0.116 |
| **RSI(B,RE)** | -0.48 | 0.073 | 0.36 | 0.182 | -0.33 | 0.234 | 0.03 | 0.911 |
| **RSI(B,NIR)** | -0.24 | 0.391 | 0.35 | 0.200 | -0.08 | 0.768 | 0.21 | 0.461 |
| **RSI(G,DB)** | 0.46 | 0.086 | 0.08 | 0.787 | 0.20 | 0.482 | 0.33 | 0.223 |
| **RSI(G,B)** | 0.49 | 0.064 | -0.21 | 0.447 | 0.58* | 0.023 | 0.42 | 0.123 |
| **RSI(G,R)** | 0.14 | 0.616 | -0.66** | 0.008 | -0.13 | 0.657 | -0.30 | 0.285 |
| **RSI(G,RE)** | -0.17 | 0.544 | 0.39 | 0.151 | -0.03 | 0.903 | 0.19 | 0.490 |
| **RSI(G,NIR)** | -0.09 | 0.757 | 0.36 | 0.186 | 0.07 | 0.799 | 0.29 | 0.303 |
| **RSI(R,DB)** | 0.20 | 0.474 | 0.76*** | 0.001 | 0.18 | 0.526 | 0.37 | 0.171 |
| **RSI(R,B)** | 0.16 | 0.563 | 0.72** | 0.002 | 0.38 | 0.158 | 0.44 | 0.097 |
| **RSI(R,G)** | -0.14 | 0.608 | 0.67** | 0.006 | 0.13 | 0.641 | 0.30 | 0.273 |
| **RSI(R,RE)** | -0.16 | 0.560 | 0.56* | 0.031 | 0.04 | 0.883 | 0.26 | 0.353 |
| **RSI(R,NIR)** | -0.10 | 0.725 | 0.50 | 0.057 | 0.10 | 0.734 | 0.31 | 0.264 |
| **RSI(RE,DB)** | 0.61* | 0.016 | -0.28 | 0.316 | 0.22 | 0.428 | 0.01 | 0.979 |
| **RSI(RE,B)** | 0.49 | 0.065 | -0.34 | 0.210 | 0.36 | 0.189 | -0.02 | 0.930 |
| **RSI(RE,G)** | 0.18 | 0.513 | -0.37 | 0.176 | 0.05 | 0.858 | -0.19 | 0.506 |
| **RSI(RE,R)** | 0.18 | 0.529 | -0.52* | 0.048 | -0.02 | 0.941 | -0.24 | 0.386 |
| **RSI(RE,NIR)** | -0.01 | 0.964 | 0.30 | 0.283 | 0.18 | 0.528 | 0.35 | 0.201 |
| **RSI(NIR,DB)** | 0.33 | 0.223 | -0.28 | 0.313 | 0.00 | 0.987 | -0.20 | 0.479 |
| **RSI(NIR,B)** | 0.26 | 0.353 | -0.32 | 0.252 | 0.11 | 0.691 | -0.19 | 0.503 |
| **RSI(NIR,G)** | 0.11 | 0.701 | -0.33 | 0.237 | -0.05 | 0.850 | -0.26 | 0.352 |
| **RSI(NIR,R)** | 0.12 | 0.663 | -0.44 | 0.098 | -0.07 | 0.800 | -0.27 | 0.330 |
| **RSI(NIR,RE)** | 0.02 | 0.937 | -0.28 | 0.308 | -0.17 | 0.550 | -0.33 | 0.228 |
| **NDSI(DB,B)** | -0.23 | 0.406 | -0.29 | 0.293 | 0.50 | 0.058 | -0.07 | 0.792 |
| **NDSI(DB,G)** | -0.45 | 0.092 | -0.07 | 0.792 | -0.19 | 0.493 | -0.32 | 0.243 |
| **NDSI(DB,R)** | -0.19 | 0.496 | -0.76** | 0.001 | -0.17 | 0.544 | -0.36 | 0.191 |
| **NDSI(DB,RE)** | -0.59* | 0.020 | 0.28 | 0.307 | -0.19 | 0.488 | 0.00 | 0.988 |
| **NDSI(DB,NIR)** | -0.31 | 0.264 | 0.30 | 0.284 | 0.02 | 0.956 | 0.21 | 0.451 |
| **NDSI(B,DB)** | 0.23 | 0.406 | 0.29 | 0.293 | -0.50 | 0.058 | 0.07 | 0.792 |
| **NDSI(B,G)** | -0.49 | 0.066 | 0.21 | 0.454 | -0.57* | 0.025 | -0.41 | 0.133 |
| **NDSI(B,R)** | -0.15 | 0.599 | -0.72** | 0.003 | -0.37 | 0.169 | -0.43 | 0.108 |
| **NDSI(B,RE)** | -0.48 | 0.071 | 0.36 | 0.189 | -0.33 | 0.223 | 0.03 | 0.916 |
| **NDSI(B,NIR)** | -0.24 | 0.386 | 0.34 | 0.210 | -0.09 | 0.756 | 0.20 | 0.468 |
| **NDSI(G,DB)** | 0.45 | 0.092 | 0.07 | 0.792 | 0.19 | 0.493 | 0.32 | 0.243 |
| **NDSI(G,B)** | 0.49 | 0.066 | -0.21 | 0.454 | 0.57* | 0.025 | 0.41 | 0.133 |
| **NDSI(G,R)** | 0.14 | 0.613 | -0.66** | 0.007 | -0.13 | 0.650 | -0.30 | 0.279 |
| **NDSI(G,RE)** | -0.17 | 0.536 | 0.38 | 0.159 | -0.04 | 0.890 | 0.19 | 0.495 |
| **NDSI(G,NIR)** | -0.09 | 0.747 | 0.35 | 0.198 | 0.07 | 0.808 | 0.28 | 0.313 |
| **NDSI(R,DB)** | 0.19 | 0.496 | 0.76** | 0.001 | 0.17 | 0.544 | 0.36 | 0.191 |
| **NDSI(R,B)** | 0.15 | 0.599 | 0.72** | 0.003 | 0.37 | 0.169 | 0.43 | 0.108 |
| **NDSI(R,G)** | -0.14 | 0.613 | 0.66** | 0.007 | 0.13 | 0.650 | 0.30 | 0.279 |
| **NDSI(R,RE)** | -0.17 | 0.553 | 0.54* | 0.036 | 0.03 | 0.902 | 0.25 | 0.363 |
| **NDSI(R,NIR)** | -0.10 | 0.716 | 0.49 | 0.066 | 0.09 | 0.747 | 0.30 | 0.278 |
| **NDSI(RE,DB)** | 0.59* | 0.020 | -0.28 | 0.307 | 0.19 | 0.488 | 0.00 | 0.988 |
| **NDSI(RE,B)** | 0.48 | 0.071 | -0.36 | 0.189 | 0.33 | 0.223 | -0.03 | 0.916 |
| **NDSI(RE,G)** | 0.17 | 0.536 | -0.38 | 0.159 | 0.04 | 0.890 | -0.19 | 0.495 |
| **NDSI(RE,R)** | 0.17 | 0.553 | -0.54* | 0.036 | -0.03 | 0.902 | -0.25 | 0.363 |
| **NDSI(RE,NIR)** | -0.02 | 0.954 | 0.29 | 0.293 | 0.17 | 0.535 | 0.34 | 0.211 |
| **NDSI(NIR,DB)** | 0.31 | 0.264 | -0.30 | 0.284 | -0.02 | 0.956 | -0.21 | 0.451 |
| **NDSI(NIR,B)** | 0.24 | 0.386 | -0.34 | 0.210 | 0.09 | 0.756 | -0.20 | 0.468 |
| **NDSI(NIR,G)** | 0.09 | 0.747 | -0.35 | 0.198 | -0.07 | 0.808 | -0.28 | 0.313 |
| **NDSI(NIR,R)** | 0.10 | 0.716 | -0.49 | 0.066 | -0.09 | 0.747 | -0.30 | 0.278 |
| **NDSI(NIR,RE)** | 0.02 | 0.954 | -0.29 | 0.293 | -0.17 | 0.535 | -0.34 | 0.211 |

orange: moderately diseased (avg. DIISHR 15-29.9%); red: severely diseased (avg. DIISHR 30-44.9%); and grey: fully damaged (avg. DIISHR ≥45%).

S12. Pleiades-Neo – Pearson correlation analysis between DIIS and spectral features at each DAI (untreated block) for Trials 1 and 2 (*P* = p-value; **P* < 0.05; ***P* < 0.01).

| **Spectral feature** | **TRIAL 1** | | | | **TRIAL 2** | | | |
| --- | --- | --- | --- | --- | --- | --- | --- | --- |
| **DAI 37** | | **DAI 44** | | **DAI 37** | | **DAI 44** | |
| **Severely Diseased** | | **Fully Diseased** | | **Moderately Diseased** | | **Severely Diseased** | |
| **r** | ***P*** | **r** | ***P*** | **r** | ***P*** | **r** | ***P*** |
| **DB** | -0.62* | 0.014 | -0.30 | 0.273 | -0.23 | 0.402 | -0.77*** | 0.001 |
| **B** | -0.50 | 0.057 | -0.17 | 0.556 | -0.37 | 0.179 | -0.54* | 0.038 |
| **G** | -0.22 | 0.433 | -0.29 | 0.292 | 0.07 | 0.798 | -0.25 | 0.366 |
| **R** | -0.24 | 0.382 | 0.56* | 0.029 | 0.15 | 0.597 | 0.07 | 0.813 |
| **RE** | 0.20 | 0.481 | -0.40 | 0.134 | 0.03 | 0.923 | -0.38 | 0.161 |
| **NIR** | 0.21 | 0.449 | -0.36 | 0.186 | -0.18 | 0.524 | -0.38 | 0.165 |
| **CIG** | 0.24 | 0.383 | -0.33 | 0.237 | -0.15 | 0.599 | -0.26 | 0.352 |
| **CVI** | 0.23 | 0.401 | -0.03 | 0.927 | -0.11 | 0.704 | -0.21 | 0.445 |
| **GLI** | 0.52* | 0.045 | -0.6* | 0.018 | 0.20 | 0.475 | -0.16 | 0.578 |
| **MSAVI2** | 0.23 | 0.419 | -0.50 | 0.057 | -0.18 | 0.518 | -0.31 | 0.264 |
| **MSR** | 0.24 | 0.392 | -0.46 | 0.086 | -0.17 | 0.552 | -0.28 | 0.312 |
| **OSAVI** | 0.23 | 0.413 | -0.49 | 0.066 | -0.18 | 0.529 | -0.30 | 0.278 |
| **PSRI** | -0.17 | 0.543 | 0.67** | 0.006 | 0.27 | 0.327 | 0.31 | 0.256 |
| **RDVI** | 0.22 | 0.422 | -0.44 | 0.100 | -0.18 | 0.524 | -0.33 | 0.228 |
| **SAVI** | 0.23 | 0.413 | -0.49 | 0.066 | -0.18 | 0.529 | -0.30 | 0.278 |
| **TVI** | 0.23 | 0.415 | -0.49 | 0.063 | -0.18 | 0.525 | -0.30 | 0.273 |
| **RSI(DB,B)** | -0.03 | 0.902 | -0.29 | 0.299 | 0.43 | 0.108 | -0.06 | 0.823 |
| **RSI(DB,G)** | -0.25 | 0.369 | -0.07 | 0.796 | -0.32 | 0.249 | -0.31 | 0.257 |
| **RSI(DB,R)** | -0.03 | 0.911 | -0.75** | 0.001 | -0.28 | 0.321 | -0.35 | 0.206 |
| **RSI(DB,RE)** | -0.58* | 0.025 | 0.28 | 0.305 | -0.17 | 0.550 | 0.01 | 0.977 |
| **RSI(DB,NIR)** | -0.39 | 0.146 | 0.30 | 0.278 | 0.08 | 0.775 | 0.21 | 0.444 |
| **RSI(B,DB)** | 0.03 | 0.907 | 0.29 | 0.287 | -0.43 | 0.114 | 0.09 | 0.761 |
| **RSI(B,G)** | -0.34 | 0.213 | 0.21 | 0.460 | -0.66** | 0.007 | -0.40 | 0.141 |
| **RSI(B,R)** | -0.02 | 0.936 | -0.71** | 0.003 | -0.47 | 0.077 | -0.42 | 0.116 |
| **RSI(B,RE)** | -0.54* | 0.036 | 0.36 | 0.182 | -0.29 | 0.300 | 0.03 | 0.911 |
| **RSI(B,NIR)** | -0.36 | 0.187 | 0.35 | 0.200 | -0.02 | 0.957 | 0.21 | 0.461 |
| **RSI(G,DB)** | 0.27 | 0.336 | 0.08 | 0.787 | 0.32 | 0.240 | 0.33 | 0.223 |
| **RSI(G,B)** | 0.35 | 0.198 | -0.21 | 0.447 | 0.68** | 0.006 | 0.42 | 0.123 |
| **RSI(G,R)** | 0.21 | 0.454 | -0.66** | 0.008 | -0.21 | 0.460 | -0.30 | 0.285 |
| **RSI(G,RE)** | -0.30 | 0.282 | 0.39 | 0.151 | 0.05 | 0.859 | 0.19 | 0.490 |
| **RSI(G,NIR)** | -0.23 | 0.417 | 0.36 | 0.186 | 0.16 | 0.575 | 0.29 | 0.303 |
| **RSI(R,DB)** | 0.05 | 0.861 | 0.76*** | 0.001 | 0.29 | 0.297 | 0.37 | 0.171 |
| **RSI(R,B)** | 0.05 | 0.858 | 0.72** | 0.002 | 0.49 | 0.065 | 0.44 | 0.097 |
| **RSI(R,G)** | -0.21 | 0.446 | 0.67** | 0.006 | 0.21 | 0.447 | 0.30 | 0.273 |
| **RSI(R,RE)** | -0.27 | 0.323 | 0.56* | 0.031 | 0.13 | 0.655 | 0.26 | 0.353 |
| **RSI(R,NIR)** | -0.23 | 0.419 | 0.50 | 0.057 | 0.18 | 0.518 | 0.31 | 0.264 |
| **RSI(RE,DB)** | 0.59* | 0.020 | -0.28 | 0.316 | 0.20 | 0.475 | 0.01 | 0.979 |
| **RSI(RE,B)** | 0.55* | 0.033 | -0.34 | 0.210 | 0.32 | 0.251 | -0.02 | 0.930 |
| **RSI(RE,G)** | 0.31 | 0.267 | -0.37 | 0.176 | -0.04 | 0.892 | -0.19 | 0.506 |
| **RSI(RE,R)** | 0.28 | 0.311 | -0.52* | 0.048 | -0.11 | 0.698 | -0.24 | 0.386 |
| **RSI(RE,NIR)** | -0.16 | 0.572 | 0.30 | 0.283 | 0.26 | 0.341 | 0.35 | 0.201 |
| **RSI(NIR,DB)** | 0.42 | 0.122 | -0.28 | 0.313 | -0.07 | 0.817 | -0.20 | 0.479 |
| **RSI(NIR,B)** | 0.37 | 0.172 | -0.32 | 0.252 | 0.04 | 0.898 | -0.19 | 0.503 |
| **RSI(NIR,G)** | 0.24 | 0.383 | -0.33 | 0.237 | -0.15 | 0.599 | -0.26 | 0.352 |
| **RSI(NIR,R)** | 0.24 | 0.384 | -0.44 | 0.098 | -0.17 | 0.556 | -0.27 | 0.330 |
| **RSI(NIR,RE)** | 0.17 | 0.551 | -0.28 | 0.308 | -0.26 | 0.351 | -0.33 | 0.228 |
| **NDSI(DB,B)** | -0.03 | 0.905 | -0.29 | 0.293 | 0.43 | 0.111 | -0.07 | 0.792 |
| **NDSI(DB,G)** | -0.26 | 0.355 | -0.07 | 0.792 | -0.32 | 0.245 | -0.32 | 0.243 |
| **NDSI(DB,R)** | -0.04 | 0.887 | -0.76** | 0.001 | -0.28 | 0.309 | -0.36 | 0.191 |
| **NDSI(DB,RE)** | -0.58* | 0.023 | 0.28 | 0.307 | -0.18 | 0.532 | 0.00 | 0.988 |
| **NDSI(DB,NIR)** | -0.40 | 0.142 | 0.30 | 0.284 | 0.08 | 0.783 | 0.21 | 0.451 |
| **NDSI(B,DB)** | 0.03 | 0.905 | 0.29 | 0.293 | -0.43 | 0.111 | 0.07 | 0.792 |
| **NDSI(B,G)** | -0.35 | 0.207 | 0.21 | 0.454 | -0.67** | 0.007 | -0.41 | 0.133 |
| **NDSI(B,R)** | -0.04 | 0.899 | -0.72** | 0.003 | -0.48 | 0.071 | -0.43 | 0.108 |
| **NDSI(B,RE)** | -0.55* | 0.035 | 0.36 | 0.189 | -0.29 | 0.288 | 0.03 | 0.916 |
| **NDSI(B,NIR)** | -0.36 | 0.185 | 0.34 | 0.210 | -0.02 | 0.947 | 0.20 | 0.468 |
| **NDSI(G,DB)** | 0.26 | 0.355 | 0.07 | 0.792 | 0.32 | 0.245 | 0.32 | 0.243 |
| **NDSI(G,B)** | 0.35 | 0.207 | -0.21 | 0.454 | 0.67** | 0.007 | 0.41 | 0.133 |
| **NDSI(G,R)** | 0.21 | 0.451 | -0.66** | 0.007 | -0.21 | 0.455 | -0.30 | 0.279 |
| **NDSI(G,RE)** | -0.30 | 0.278 | 0.38 | 0.159 | 0.05 | 0.870 | 0.19 | 0.495 |
| **NDSI(G,NIR)** | -0.23 | 0.410 | 0.35 | 0.198 | 0.16 | 0.581 | 0.28 | 0.313 |
| **NDSI(R,DB)** | 0.04 | 0.887 | 0.76** | 0.001 | 0.28 | 0.309 | 0.36 | 0.191 |
| **NDSI(R,B)** | 0.04 | 0.899 | 0.72** | 0.003 | 0.48 | 0.071 | 0.43 | 0.108 |
| **NDSI(R,G)** | -0.21 | 0.451 | 0.66** | 0.007 | 0.21 | 0.455 | 0.30 | 0.279 |
| **NDSI(R,RE)** | -0.28 | 0.320 | 0.54* | 0.036 | 0.12 | 0.671 | 0.25 | 0.363 |
| **NDSI(R,NIR)** | -0.23 | 0.413 | 0.49 | 0.066 | 0.18 | 0.529 | 0.30 | 0.278 |
| **NDSI(RE,DB)** | 0.58* | 0.023 | -0.28 | 0.307 | 0.18 | 0.532 | 0.00 | 0.988 |
| **NDSI(RE,B)** | 0.55* | 0.035 | -0.36 | 0.189 | 0.29 | 0.288 | -0.03 | 0.916 |
| **NDSI(RE,G)** | 0.30 | 0.278 | -0.38 | 0.159 | -0.05 | 0.870 | -0.19 | 0.495 |
| **NDSI(RE,R)** | 0.28 | 0.320 | -0.54* | 0.036 | -0.12 | 0.671 | -0.25 | 0.363 |
| **NDSI(RE,NIR)** | -0.16 | 0.564 | 0.29 | 0.293 | 0.26 | 0.344 | 0.34 | 0.211 |
| **NDSI(NIR,DB)** | 0.40 | 0.142 | -0.30 | 0.284 | -0.08 | 0.783 | -0.21 | 0.451 |
| **NDSI(NIR,B)** | 0.36 | 0.185 | -0.34 | 0.210 | 0.02 | 0.947 | -0.20 | 0.468 |
| **NDSI(NIR,G)** | 0.23 | 0.410 | -0.35 | 0.198 | -0.16 | 0.581 | -0.28 | 0.313 |
| **NDSI(NIR,R)** | 0.23 | 0.413 | -0.49 | 0.066 | -0.18 | 0.529 | -0.30 | 0.278 |
| **NDSI(NIR,RE)** | 0.16 | 0.564 | -0.29 | 0.293 | -0.26 | 0.344 | -0.34 | 0.211 |

orange: moderately diseased (avg. DIISHR 15-29.9%); red: severely diseased (avg. DIISHR 30-44.9%); and grey: fully damaged (avg. DIISHR ≥45%).

S13. Pearson correlation analysis of the AUCs of SkySat spectral features with AUDPC and yield, respectively (untreated block) (*P* = p-value; **P* < 0.05; ***P* < 0.01).

| **AUC of spectral feature** | **AUDPC** | | | | **YIELD** | | | |
| --- | --- | --- | --- | --- | --- | --- | --- | --- |
| ***Trial 1*** | | ***Trial 2*** | | ***Trial 1*** | | ***Trial 2*** | |
| r | *P* | r | *P* | r | *P* | r | *P* |
| **B-AUC** | -0.55* | 0.034 | -0.54* | 0.039 | 0.08 | 0.772 | 0.45 | 0.095 |
| **G-AUC** | -0.29 | 0.300 | -0.14 | 0.610 | 0.07 | 0.815 | 0.31 | 0.257 |
| **R-AUC** | -0.22 | 0.431 | -0.05 | 0.869 | 0.03 | 0.910 | 0.30 | 0.273 |
| **NIR-AUC** | 0.14 | 0.627 | 0.01 | 0.968 | -0.03 | 0.911 | -0.23 | 0.414 |
| **CIG-AUC** | 0.23 | 0.405 | 0.06 | 0.830 | -0.05 | 0.868 | -0.29 | 0.287 |
| **CVI-AUC** | 0.17 | 0.550 | 0.05 | 0.871 | 0.01 | 0.973 | -0.25 | 0.376 |
| **GLI-AUC** | 0.33 | 0.234 | 0.16 | 0.569 | -0.09 | 0.742 | -0.30 | 0.274 |
| **MSAVI2-AUC** | 0.10 | 0.713 | -0.03 | 0.919 | 0.01 | 0.965 | -0.25 | 0.378 |
| **MSR-AUC** | 0.24 | 0.385 | 0.04 | 0.875 | -0.07 | 0.797 | -0.28 | 0.308 |
| **OSAVI-AUC** | 0.13 | 0.648 | -0.01 | 0.963 | 0.00 | 0.990 | -0.25 | 0.364 |
| **RDVI-AUC** | 0.14 | 0.622 | 0.01 | 0.985 | -0.02 | 0.938 | -0.24 | 0.383 |
| **SAVI-AUC** | 0.13 | 0.649 | -0.01 | 0.963 | 0.00 | 0.989 | -0.25 | 0.364 |
| **TVI-AUC** | 0.12 | 0.672 | -0.02 | 0.948 | 0.00 | 0.995 | -0.25 | 0.369 |
| **RSI(B,G)-AUC** | -0.57* | 0.025 | -0.63* | 0.012 | 0.13 | 0.636 | 0.44 | 0.102 |
| **RSI(B,R)-AUC** | -0.47 | 0.075 | -0.64** | 0.009 | 0.06 | 0.835 | 0.30 | 0.275 |
| **RSI(B,NIR)-AUC** | -0.39 | 0.155 | -0.30 | 0.277 | 0.04 | 0.900 | 0.39 | 0.147 |
| **RSI(G,B)-AUC** | 0.54* | 0.039 | 0.20 | 0.478 | -0.28 | 0.317 | -0.34 | 0.211 |
| **RSI(G,R)-AUC** | 0.14 | 0.624 | -0.02 | 0.947 | -0.09 | 0.745 | -0.20 | 0.476 |
| **RSI(G,NIR)-AUC** | -0.17 | 0.536 | -0.01 | 0.984 | 0.03 | 0.919 | 0.25 | 0.376 |
| **RSI(R,B)-AUC** | 0.32 | 0.243 | 0.12 | 0.683 | -0.14 | 0.607 | -0.30 | 0.270 |
| **RSI(R,G)-AUC** | -0.05 | 0.854 | 0.02 | 0.939 | 0.01 | 0.958 | 0.20 | 0.475 |
| **RSI(R,NIR)-AUC** | -0.10 | 0.713 | 0.03 | 0.920 | -0.01 | 0.965 | 0.25 | 0.378 |
| **RSI(NIR,B)-AUC** | 0.57* | 0.026 | 0.18 | 0.510 | -0.26 | 0.344 | -0.39 | 0.155 |
| **RSI(NIR,G)-AUC** | 0.23 | 0.405 | 0.06 | 0.830 | -0.05 | 0.868 | -0.29 | 0.287 |
| **RSI(NIR,R)-AUC** | 0.29 | 0.301 | 0.06 | 0.820 | -0.10 | 0.718 | -0.30 | 0.285 |
| **NDSI(B,G)-AUC** | -0.6* | 0.018 | -0.67** | 0.006 | 0.16 | 0.574 | 0.50 | 0.058 |
| **NDSI(B,R)-AUC** | -0.52* | 0.045 | -0.7** | 0.003 | 0.12 | 0.676 | 0.38 | 0.160 |
| **NDSI(B,NIR)-AUC** | -0.40 | 0.139 | -0.31 | 0.262 | 0.04 | 0.875 | 0.40 | 0.141 |
| **NDSI(G,B)-AUC** | 0.6* | 0.018 | 0.67** | 0.006 | -0.16 | 0.574 | -0.50 | 0.058 |
| **NDSI(G,R)-AUC** | 0.10 | 0.732 | -0.02 | 0.943 | -0.06 | 0.845 | -0.20 | 0.477 |
| **NDSI(G,NIR)-AUC** | -0.18 | 0.521 | -0.01 | 0.958 | 0.03 | 0.914 | 0.25 | 0.364 |
| **NDSI(R,B)-AUC** | 0.52* | 0.045 | 0.7** | 0.003 | -0.12 | 0.676 | -0.38 | 0.160 |
| **NDSI(R,G)-AUC** | -0.10 | 0.732 | 0.02 | 0.943 | 0.06 | 0.845 | 0.20 | 0.477 |
| **NDSI(R,NIR)-AUC** | -0.13 | 0.648 | 0.01 | 0.963 | 0.00 | 0.990 | 0.25 | 0.364 |
| **NDSI(NIR,B)-AUC** | 0.40 | 0.139 | 0.31 | 0.262 | -0.04 | 0.875 | -0.40 | 0.141 |
| **NDSI(NIR,G)-AUC** | 0.18 | 0.521 | 0.01 | 0.958 | -0.03 | 0.914 | -0.25 | 0.364 |
| **NDSI(NIR,R)-AUC** | 0.13 | 0.648 | -0.01 | 0.963 | 0.00 | 0.990 | -0.25 | 0.364 |
